# Supplementary material for: Identification of Known and Novel Arundo donax L. MicroRNAs and Their Targets Using High-Throughput Sequencing and Degradome Analysis
Source: Life (Basel). 2022 Apr 27;12(5):651. doi: 10.3390/life12050651 (PMC9142972; doi:10.3390/life12050651)
Supplement: Supplementary file 1 [file life-12-00651-s001.zip]

Archive with 10 entries (10 files):
- FigureS1.pdf
- FigureS2.pdf
- FigureS3.pdf
- FigureS4.pdf
- TableS1.pdf
- TableS2.pdf
- TableS3.xlsx
- TableS4.xlsx
- TableS5.xlsx
- TableS6.xlsx
