# Supplementary material for: Identification of Known and Novel Arundo donax L. MicroRNAs and Their Targets Using High-Throughput Sequencing and Degradome Analysis
Source: Life (Basel). 2022 Apr 27;12(5):651. doi: 10.3390/life12050651 (PMC9142972; doi:10.3390/life12050651)
Supplement: Supplementary file 1 [file life-12-00651-s001.zip › TableS1.pdf]

Table S1 - primer sequences and melting temperature used for PCRs in 5' RACE

| <b>Name</b>   | <b>Sequence</b>               | <b>Melting temperature</b> |
|---------------|-------------------------------|----------------------------|
| 5' adapter_fw | 5'-G TTCAGAGTTCTACAGTCCGAC-3' | 47°C                       |
| TR10651_rev   | 5'-CCTTGAACCACTCTTGTCGC-3'    | 56°C                       |
| TR4471_rev    | 5'-TCCCTCACCTCTCTGCTCATG-3'   | 54°C                       |
