# Supplementary material for: Identification of Known and Novel Arundo donax L. MicroRNAs and Their Targets Using High-Throughput Sequencing and Degradome Analysis
Source: Life (Basel). 2022 Apr 27;12(5):651. doi: 10.3390/life12050651 (PMC9142972; doi:10.3390/life12050651)
Supplement: Supplementary file 1 [file life-12-00651-s001.zip › TableS2.pdf]

Table S2 - Reads statistics of small RNAs high-throughput sequencing

| <b>Treatment</b> | <b>raw reads<br/>(redundant)</b> | <b>raw reads (non-<br/>redundant)</b> | <b>clean reads<br/>(redundant)</b> | <b>clean reads (non-<br/>redundant)</b> |
|------------------|----------------------------------|---------------------------------------|------------------------------------|-----------------------------------------|
| C                | 12,616,870                       | 2,008,550                             | 2,766,570                          | 1,105,041                               |
| +P               | 14,180,274                       | 2,751,532                             | 4,096,100                          | 1,704,026                               |
| +Na              | 11,403,618                       | 1,963,790                             | 2,545,750                          | 983,071                                 |
| +NaP             | 9,813,447                        | 1,741,065                             | 2,683,450                          | 880,357                                 |
