# Supplementary material for: Identification of Known and Novel Arundo donax L. MicroRNAs and Their Targets Using High-Throughput Sequencing and Degradome Analysis
Source: Life (Basel). 2022 Apr 27;12(5):651. doi: 10.3390/life12050651 (PMC9142972; doi:10.3390/life12050651)
Supplement: Supplementary file 1 [file life-12-00651-s001.zip › TableS3.xlsx]

## Sheet: miRNA_conserved_list_and TMMs
miRNA	sequence	length	C counts	P counts	Na counts	NaP counts	TMM C	TMM P	TMM Na	TMM NaP
miR1128	UACUACUCCCUCCGUCCCAAA	21	4	9	7	8	4,83967485858933	5,22397238627205	8,73325693765806	10,860876693168
miR1128*	UAUUACUCCCUCCGUCCCAAA	21	7	13	2	9	8,46943100253133	7,54573789128185	2,4952162679023	12,218486279814
miR1432	UUCAGGAGAGAUGACAUCGACA	22	130	273	145	154	157,289432904153	158,460495716919	180,903179422917	209,071876343484
miR1432-5p	UCAGGAGAGAUGACACCGACG	21	249	510	370	401	301,269759947186	296,025101888749	461,615009561926	544,401444245046
miR156d-3p	GCUCACUCAUCUUUCUGUCAGC	22	9	29	27	15	10,889268431826	16,832799911321	33,6854196166811	20,36414379969
miR156d-3p*	GCUGACAGAAAGAUGAGUGAGC	22	1	3	0	0	1,20991871464733	1,74132412875735	0	0
miR156j-5p.1	UGACAGAAGAGAGUGAGCAC	20	565	1281	778	1049	683,604073775743	743,545402979388	970,639128213996	1424,13245639165
miR156j-5p.2	UGACAGAAGAGAGCGAGCAC	20	433	883	451	490	523,894803442295	512,529735230913	562,671268411969	665,22869745654
miR156j-5p.2*	UGUGCUCGCUCUCUUCUGUCA	21	0	0	1	0	0	0	1,24760813395115	0
miR156k	UGACAGAAGAGAGAGAGCACA	21	30	72	55	56	36,29756143942	41,7917790901764	68,6184473673133	76,026136852176
miR159a.2	UUGCAUGCCCCAGGAGCUGCA	21	38	85	43	53	45,9769111565986	49,3375169814582	53,6471497598995	71,953308092238
miR159a-3p	CUUGGAUUGAAGGGAGCUCU	20	58	103	43	43	70,1752854495453	59,7854617540023	53,6471497598995	58,377212225778
miR159b	UUUGGAUUGAAGGGAGCUCUG	21	4502	8801	3976	4326	5447,05405334229	5108,46455239781	4960,48994058978	5873,0190718306
miR159b-3p	UUUGCAUGACCGAGGAGCCGC	21	66	95	47	36	79,854635166724	55,1419307439827	58,6375822957041	48,873945119256
miR159e	AUUGGAUUGAAGGGAGCUCCU	21	484	861	137	142	585,600657889309	499,760024953359	170,922314351308	192,780561303732
miR160a	UGCCUGGCUCCCUGUAUGCCA	21	430	2052	488	309	520,265047298353	1191,06570407003	608,832769368162	419,501362273614
miR160f	UGCCUGGCUCCCUGAAUGCCA	21	208	555	156	98	251,663092646645	322,14496382011	194,62686889638	133,045739491308
miR162a-3p	UCGAUAAACCUCUGCAUCCAG	21	1686	3542	1760	1657	2039,9229528954	2055,92335468618	2195,79031575403	2249,55908507242
miR162a-5p	GGGCGCAGUGGUUUAUCGAUC	21	58	125	41	44	70,1752854495453	72,5551720315562	51,1519334919972	59,734821812424
miR164a-3p	AUGUGCCCAUCUUCUCCACC	20	150	297	127	183	181,4878071971	172,391088746978	158,446233011796	248,442554356218
miR164a-3p*	UGGAGAAGAUGGGCACAUGCA	21	3	14	3	3	3,629756143942	8,1261792675343	3,74282440185346	4,072828759938
miR164a-5p	UGGAGAAGCAGGGCACGUGCA	21	5561	15993	4762	5024	6728,35797215382	9282,99893040543	5941,10993387538	6820,63056330951
miR164a-5p.1	UGGAGAAGCAGGACACGUGAG	21	1046	1664	273	192	1265,57497552111	965,854450084076	340,597020568664	260,661040636032
miR164c	UGGAGAAGCAGGGAACGUGCA	21	13	37	4	14	15,7289432904153	21,4763309213406	4,99043253580461	19,006534213044
miR164f-3p	AUGUGCCCAUCUUCUCCACC	20	150	297	127	183	181,4878071971	172,391088746978	158,446233011796	248,442554356218
miR164f-3p*	UGGAGAAGAUGGGCACAUGCA	21	3	14	3	3	3,629756143942	8,1261792675343	3,74282440185346	4,072828759938
miR164f-5p	UGGAGAAGCAGGGCACGUGCA	21	5561	15993	4762	5024	6728,35797215382	9282,99893040543	5941,10993387538	6820,63056330951
miR164f-5p.1	UGGAGAAGCAGGACACGUGAG	21	1046	1664	273	192	1265,57497552111	965,854450084076	340,597020568664	260,661040636032
miR164h-5p	UGGAGAAGCAGGGCACGUGUG	21	97	285	59	46	117,362115320791	165,425792231948	73,608879903118	62,450040985716
miR166-3p	UCGGACCAGGCUUCAUUCCCC	21	28768	49012	27690	27575	34806,9415829745	28448,5927328851	34546,2692291074	37436,0843517635
miR166-5p	GGAAUGUUGUCUGGCUCGAGG	21	100	162	75	84	120,991871464733	94,0315029528969	93,5706100463364	114,039205278264
miR166-5p*	UCGAGCCAGACAACAUUCCCC	21	0	2	0	0	0	1,1608827525049	0	0
miR167-3p.1	GAUCAUGCUGUGCGGUUUCAUC	22	118	279	201	159	142,770408328385	161,943143974433	250,769234924181	215,859924276714
miR167a-5p.1	UGAAGCUGCCAGCAUGAUCUGA	22	10387	21214	15381	17408	12567,4256890418	12313,4833558195	19189,4607083027	23633,2676843336
miR167c-5p	UGAAGCUGCCAGCAUGAUCUGC	22	1396	3552	1332	1452	1689,04652564768	2061,7277684487	1661,81403442293	1971,24911980999
miR167d-3p	AGGUCAUGCUGUAGUUUCAUC	21	31	20	84	54	37,5074801540673	11,608827525049	104,799083251897	73,310917678884
miR167d-5p	UGAAACUGCCAGCAUGAUCUGA	22	8	12	7	13	9,67934971717866	6,9652965150294	8,73325693765806	17,648924626398
miR167f-3p	GAUCAUGCUGUGCAGUUUCAUC	22	43	94	31	14	52,0265047298353	54,5614893677303	38,6758521524857	19,006534213044
miR167f-5p	UGAAACUGCCAGCAUGAUCUGA	22	8	12	7	13	9,67934971717866	6,9652965150294	8,73325693765806	17,648924626398
miR167h-5p	UGAAACUGCCAGCAUGAUCUGA	22	8	12	7	13	9,67934971717866	6,9652965150294	8,73325693765806	17,648924626398
miR167i-3p	AGAUCAUGUUGCAGCUUCACU	21	98	206	82	85	118,572034035439	119,570923508005	102,303866983994	115,39681486491
miR168-3p	GAUCCCGCCUUGCACCAAGUGAAU	24	9362	22964	7110	6179	11327,2590065283	13329,2557642613	8870,49383239269	8388,66963588564
miR168-5p	UCGCUUGGUGCAGAUCGGGAC	21	4192	9278	4505	4912	5071,97925180162	5385,33508887023	5620,47464344994	6668,57828960515
miR169a	CAGCCAAGGAUGACUUGCCGA	21	33	124	48	43	39,927317583362	71,9747306553038	59,8851904296553	58,377212225778
miR169a*	CAUCGGCAAGUCAUCCUUGGC	21	1	0	0	0	1,20991871464733	0	0	0
miR169c-3p	GGCAAGUCUGUCCUUGGCUACA	22	116	536	30	15	140,350570899091	311,116577671313	37,4282440185345	20,36414379969
miR169c-3p*	UGUAGCCAAGGACAGACUUGCC	22	5	0	4	3	6,04959357323666	0	4,99043253580461	4,072828759938
miR169c-5p	CAGCCAAGGAUGACUUGCCGG	21	28	177	27	22	33,8777240101253	102,738123596684	33,6854196166811	29,867410906212
miR169g	UAGCCAAGGAUGACUUGCCUA	21	97	393	216	113	117,362115320791	228,113460867213	269,483356933449	153,409883290998
miR169l	UAGCCAAGGAUGACUUGCCUG	21	93	294	72	107	112,522440462202	170,64976461822	89,8277856444829	145,264225771122
miR169m	UAGCCAAGGAUGACUUGCCUG	21	93	294	72	107	112,522440462202	170,64976461822	89,8277856444829	145,264225771122
miR169n	UAGCCAAGAAUGACUUGCCUA	21	591	2913	1997	1465	715,061960356574	1690,82572902339	2491,47344350045	1988,89804443639
miR169o	UAGCCAAGAAUGACUUGCCUA	21	591	2913	1997	1465	715,061960356574	1690,82572902339	2491,47344350045	1988,89804443639
miR169q	UAGCCAAGGAUGACUUGCCUA	21	97	393	216	113	117,362115320791	228,113460867213	269,483356933449	153,409883290998
miR171a-3p	UGAGCCGAACCAAUAUCACUC	21	59	75	20	12	71,3852041641926	43,5331032189337	24,952162679023	16,291315039752
miR171b	UGAUUGAGCCGUGCCAAUAUC	21	1614	4771	1452	1176	1952,8088054408	2769,28580610044	1811,52701049707	1596,5488738957
miR171b*	AUUUGAUAUUGGCACGGCUCAGUC	24	0	1	0	0	0	0,58044137625245	0	0
miR172	CAGCACCAUCAAGAUUCACA	20	164	466	260	265	198,426669202163	270,485681333642	324,378114827299	359,76654046119
miR172b	GGAAUCUUGAUGAUGCUGCAU	21	253	722	350	386	306,109434805775	419,078673654269	436,662846882903	524,037300445356
miR172b*	GCAGCAUCAUCAAGAUUCAC	20	1	2	0	1	1,20991871464733	1,1608827525049	0	1,357609586646
miR172d-3p	AGAAUCUUGAUGAUGCUGCAU	21	2686	7429	2704	2878	3249,84166754274	4312,09898417945	3373,53239420391	3907,20039036719
miR172d-3p*	GCAGCAUCAUCAAGAUUCAC	20	1	2	0	1	1,20991871464733	1,1608827525049	0	1,357609586646
miR172d-5p	GCAGCACCAUCAAGAUUCAG	20	29	76	69	51	35,0876427247727	44,1135445951862	86,0849612426295	69,238088918946
miR1878-3p	AUUUGUAGUGUUCAGAUUGAGUUU	24	30	40	21	7	36,29756143942	23,217655050098	26,1997708129742	9,503267106522
miR1878-5p	ACUUAGUCUGGACACUAUAAAAA	23	12	26	9	8	14,519024575768	15,0914757825637	11,2284732055604	10,860876693168
miR2118a	UUCCUGAUGCCUCUCAUGCCUA	22	41	103	20	7	49,6066673005406	59,7854617540023	24,952162679023	9,503267106522
miR2118b	UUCCCGAUGCCUCCCAUUCCUA	22	32	76	17	8	38,7173988687147	44,1135445951862	21,2093382771696	10,860876693168
miR2118d	UUCCUGAUGCCUCCCAUGCCUA	22	27	32	3	1	32,667805295478	18,5741240400784	3,74282440185346	1,357609586646
miR2118h	UUCCUGAUGCCUCUCAUUCCUA	22	1	3	2	3	1,20991871464733	1,74132412875735	2,4952162679023	4,072828759938
miR2275a	UUUGGUUUCCUCCAAUGUCUCA	22	3	14	4	1	3,629756143942	8,1261792675343	4,99043253580461	1,357609586646
miR2275c	AGGGAUAGAGGGACUUGAACC	21	1	4	4	1	1,20991871464733	2,3217655050098	4,99043253580461	1,357609586646
miR2275c*	GGUUCAAGUCCCUCUAUCCCU	21	126190	114068	137557	65534	152679,642601347	66209,7869063644	171617,232081919	88969,586651259
miR319a	UUGGACUGAAGGGAGCUCCCU	21	37	49	34	35	44,7669924419513	28,44162743637	42,4186765543392	47,51633553261
miR319b-3p	UUGGACUGAAGGGUGCUCCCU	21	379	530	448	536	458,559192851339	307,633929413798	558,928444010116	727,678738442256
miR390-3p	CGCUAUCUAUCCUGAGCUCC	20	2	16	4	6	2,41983742929467	9,2870620200392	4,99043253580461	8,145657519876
miR390-5p	AAGCUCAGGAGGGAUAGCGCC	21	31	39	23	21	37,5074801540673	22,6372136738455	28,6949870808765	28,509801319566
miR390-5p.1	AAGCUCAGGAGGGAUAGCACC	21	13	12	1	2	15,7289432904153	6,9652965150294	1,24760813395115	2,715219173292
miR393-5p	UUCCAAAGGGAUCGCAUUGAU	21	187	705	213	127	226,254799639051	409,211170257977	265,740532531595	172,416417504042
miR393-5p*	UCAAUGCGAUCCCUUUGGAA	20	0	3	0	0	0	1,74132412875735	0	0
miR393a	UCCAAAGGGAUCGCAUUGAUUC	22	3320	11068	2543	1933	4016,93013262915	6424,32515236211	3172,66748463778	2624,25933098672
miR393a-5p	UCCAAAGGGAUCGCAUUGAUCU	22	1534	6671	1730	1147	1856,01530826901	3872,12442098009	2158,36207173549	1557,17819588296
miR393b-3p	AUCAGUGCAAUCCCUUUGGAAU	22	1549	5559	1420	1017	1874,16408898872	3226,67361058737	1771,60355021064	1380,68894961898
miR393b-3p*	CUCCAAAGGGAUUGCAUUGAU	21	1	7	5	1	1,20991871464733	4,06308963376715	6,23804066975576	1,357609586646
miR393b-3p.1	UCAGUGCAAUCCCUUUGGAAU	21	1535	5525	1407	1013	1857,22522698366	3206,93860379479	1755,38464446927	1375,2585112724
miR393b-5p	UCCAAAGGGAUCGCAUUGAUCC	22	199	914	232	151	240,773824214819	530,523417894739	289,445087076667	204,999047583546
miR393c-5p	UCCAAAGGGAUCGCAUUGAUCU	22	1534	6671	1730	1147	1856,01530826901	3872,12442098009	2158,36207173549	1557,17819588296
miR394	UUGGCAUUCUGUCCACCUCC	20	883	1987	574	532	1068,35822503359	1153,33701461362	716,127068887961	722,248300095672
miR394*	GGAGGUGGACAGAAUGCCAA	20	0	1	1	0	0	0,58044137625245	1,24760813395115	0
miR395a	GUGAAGUGUUUGGGGGAACUC	21	132	234	204	99	159,709270333448	135,823282043073	254,512059326035	134,403349077954
miR395b	GUGAAGUGUUUGGGGGAACUC	21	132	234	204	99	159,709270333448	135,823282043073	254,512059326035	134,403349077954
miR395c	GUGAAGUGUUUGGGGGAACUC	21	132	234	204	99	159,709270333448	135,823282043073	254,512059326035	134,403349077954
miR395d	GUGAAGUGUUUGGGGGAACUC	21	132	234	204	99	159,709270333448	135,823282043073	254,512059326035	134,403349077954
miR395e	GUGAAGUGUUUGGGGGAACUC	21	132	234	204	99	159,709270333448	135,823282043073	254,512059326035	134,403349077954
miR395f	GUGAAGUGUUUGGGGGAACUC	21	132	234	204	99	159,709270333448	135,823282043073	254,512059326035	134,403349077954
miR395g	GUGAAGUGUUUGGGGGAACUC	21	132	234	204	99	159,709270333448	135,823282043073	254,512059326035	134,403349077954
miR395h	GUGAAGUGUUUGGGGGAACUC	21	132	234	204	99	159,709270333448	135,823282043073	254,512059326035	134,403349077954
miR395i	GUGAAGUGUUUGGGGGAACUC	21	132	234	204	99	159,709270333448	135,823282043073	254,512059326035	134,403349077954
miR395j	GUGAAGUGUUUGGGGGAACUC	21	132	234	204	99	159,709270333448	135,823282043073	254,512059326035	134,403349077954
miR395k	GUGAAGUGUUUGGGGGAACUC	21	132	234	204	99	159,709270333448	135,823282043073	254,512059326035	134,403349077954
miR395l	GUGAAGUGUUUGGGGGAACUC	21	129	223	188	90	156,079514189506	129,438426904296	234,550329182817	122,18486279814
miR395m	GUGAAGUGUUUGGGGGAACUC	21	129	223	188	90	156,079514189506	129,438426904296	234,550329182817	122,18486279814
miR395n	GUGAAGUGUUUGGGGGAACUC	21	129	223	188	90	156,079514189506	129,438426904296	234,550329182817	122,18486279814
miR395o	GUGAAGUGUUUGGGGGAACUC	21	129	223	188	90	156,079514189506	129,438426904296	234,550329182817	122,18486279814
miR395p	GUGAAGUGUUUGGGGGAACUC	21	129	223	188	90	156,079514189506	129,438426904296	234,550329182817	122,18486279814
miR395q	GUGAAGUGUUUGGGGGAACUC	21	129	223	188	90	156,079514189506	129,438426904296	234,550329182817	122,18486279814
miR395s	GUGAAGUGUUUGGGGGAACUC	21	129	223	188	90	156,079514189506	129,438426904296	234,550329182817	122,18486279814
miR395y	GUGAAGUGUUUGGGGGAACUC	21	129	223	188	90	156,079514189506	129,438426904296	234,550329182817	122,18486279814
miR396-3p	GUUCAAUAAAGCUGUGGGAAA	21	30	35	14	27	36,29756143942	20,3154481688357	17,4665138753161	36,655458839442
miR396a	UUCCACAGGCUUUCUUGAACUG	22	47867	83054	29940	28914	57915,1791140239	48207,978063271	37353,3875304975	39253,9235882825
miR396a-3p	GUUCAAUAAAGCUGUGGGAAA	21	30	35	14	27	36,29756143942	20,3154481688357	17,4665138753161	36,655458839442
miR396b	UUCCACAGCUUUCUUGAACU	20	2729	5632	1335	1126	3301,86817227257	3269,0458310538	1665,55685882479	1528,6683945634
miR396e	UCCACAGGCUUUCUUGAACUG	21	47858	83040	29922	28912	57904,2898455921	48199,8518840034	37330,9305840864	39251,2083691092
miR398b-3p	UGUGUUCUCAGGUCGCCCCUG	21	5	13	3	1	6,04959357323666	7,54573789128185	3,74282440185346	1,357609586646
miR398b-3p*	GGGGCGACCUGAGAACACA	19	6	5	1	0	7,259512287884	2,90220688126225	1,24760813395115	0
miR398b-3p.1	UGUGUUCUCAGGUCGCCCCCG	21	19	82	66	51	22,9884555782993	47,5961928527009	82,342136840776	69,238088918946
miR398b-3p.1*	GGGGGCGACCUGAGAACACA	20	20	23	6	1	24,1983742929467	13,3501516538063	7,48564880370691	1,357609586646
miR398b-5p	GGGGCGGACUGGGAACACAUG	21	17	21	61	26	20,5686181490047	12,1892689013014	76,1040961710202	35,297849252796
miR398b-5p*	UGUGUUCCCAGUCCGCCCC	19	1	15	2	4	1,20991871464733	8,70662064378675	2,4952162679023	5,430438346584
miR399a	UGCCAAAGGAGAAUUGCCCUG	21	14	5	20	10	16,9388620050627	2,90220688126225	24,952162679023	13,57609586646
miR399d	UGCCAAAGGAGAGUUGCCCUG	21	71	16	40	32	85,9042287399606	9,2870620200392	49,9043253580461	43,443506772672
miR408-3p	CUGCACUGCCUCUUCCCUGGC	21	36	100	79	68	43,557073727304	58,044137625245	98,561042582141	92,317451891928
miR408-3p.1	UGCACUGCCUCUUCCCUGGCU	21	59	214	108	101	71,3852041641926	124,214454518024	134,741678466724	137,118568251246
miR408-5p	CAGGGAUGAGGCAGAGCAUGG	21	9	22	5	4	10,889268431826	12,7697102775539	6,23804066975576	5,430438346584
miR444a-3p	UGCAGUUGCUGCCUCAAGCUU	21	427	957	477	541	516,635291154411	555,482397073594	595,109079894699	734,466786375486
miR444a-5p	GCUAGAGGCGGCAACUGCAUA	21	19	29	17	15	22,9884555782993	16,832799911321	21,2093382771696	20,36414379969
miR444b	UGCAGUUGUUGUCUCAAGCUU	21	762	1634	287	344	921,958060561268	948,441208796503	358,063534443981	467,017697806224
miR444c	UGCAGUUGUUGUCUCAAGCUU	21	762	1634	287	344	921,958060561268	948,441208796503	358,063534443981	467,017697806224
miR444d	UUGUGGCUUUCUUGCAAGUUG	21	63	250	122	133	76,224879022782	145,110344063112	152,20819234204	180,562075023918
miR444f	UGCAGUUGUUGCCUCAAGCUU	21	298	663	224	315	360,555776964905	384,832632455374	279,464222005058	427,64701979349
miR479	UGAGCCGAACCAAUAUCACUC	21	59	75	20	12	71,3852041641926	43,5331032189337	24,952162679023	16,291315039752
miR5072	CGAUUCCCCAGCGGAGUCGCCA	22	16132	11289	8086	11162	19518,4087046908	6552,60269651391	10088,159371129	15153,6382061427
miR5076	GAAAUGGGAGCAGAGCAGGUUU	22	124	163	173	70	150,029920616269	94,6119443291493	215,836207173549	95,03267106522
miR5082	UGCGAUGAUGGCCGCGCGGGUUCA	24	116	192	405	371	140,350570899091	111,44474424047	505,281294250216	503,673156645666
miR5083	AGACUACAAUUAUCUGAUCA	20	119	124	159	146	143,980327043033	71,9747306553038	198,369693298233	198,210999650316
miR5139a	GAAACCUGGCUCUGAUACCA	20	31	34	13	22	37,5074801540673	19,7350067925833	16,218905741365	29,867410906212
miR5139a*	UGGUAUCAGAGCCAGGUUG	19	2	1	2	0	2,41983742929467	0,58044137625245	2,4952162679023	0
miR5168-3p	UCGGACCAGGCUUCAAUCCCU	21	2732	5157	1992	2286	3305,49792841651	2993,33617733388	2485,23540283069	3103,49551507276
miR5179	UUUUGCUCAAGACCGCGCAAC	21	45	146	24	35	54,44634215913	84,7444409328577	29,9425952148276	47,51633553261
miR528-3p	CCUGUGCCUGCCUCUUCCAUU	21	46	90	87	28	55,6562608737773	52,2397238627205	108,54190765375	38,013068426088
miR528-5p	UGGAAGGGGCAUGCAGAGGAG	21	162	388	464	389	196,006831772868	225,211253985951	578,890174153334	528,110129205294
miR529a	GCUGUACCCUCUCUCUUCUUC	21	5	22	0	0	6,04959357323666	12,7697102775539	0	0
miR529b	AGAAGAGAGAGAGUACAGCUU	21	0	2	4	6	0	1,1608827525049	4,99043253580461	8,145657519876
miR529b*	GCUGUACUCUCUCUCUUCU	19	0	0	1	0	0	0	1,24760813395115	0
miR529b.1	AGAAGAGAGAGAGUACAGCCU	21	46	139	25	28	55,6562608737773	80,6813512990905	31,1902033487788	38,013068426088
miR529b.1*	AGGCUGUACUCUCUCUCUUCU	21	0	1	2	1	0	0,58044137625245	2,4952162679023	1,357609586646
miR530	UGCAUUUGCACCUGCACCUAC	21	10	76	34	27	12,0991871464733	44,1135445951862	42,4186765543392	36,655458839442
miR535-5p	UGACGACGAGAGAGAGCACGC	21	15	33	17	7	18,14878071971	19,1545654163308	21,2093382771696	9,503267106522
miR5523	UGAGGAGGAACAUAUUUACUAG	22	2	0	4	3	2,41983742929467	0	4,99043253580461	4,072828759938
miR5523*	CUAGUAAAUAUGUUCCUCCUCA	22	335	454	287	88	405,322769406857	263,520384818612	358,063534443981	119,469643624848
miR5538	ACUGAACUCAAUCACUUGCUGC	22	17	23	13	12	20,5686181490047	13,3501516538063	16,218905741365	16,291315039752
miR5538*	GCAGCAAGUGAUUGAGUUCAGU	22	1	3	5	1	1,20991871464733	1,74132412875735	6,23804066975576	1,357609586646
miR6222-3p	CUAGCUGAUCCAAACAGGCCC	21	3	8	5	0	3,629756143942	4,6435310100196	6,23804066975576	0
miR6222-3p*	GGGCCUGUUUGGAUCAACUAG	21	0	4	1	3	0	2,3217655050098	1,24760813395115	4,072828759938
miR6253	GAGGAAAGUGGGCAGUUGGGUU	22	164	43	166	47	198,426669202163	24,9589791788553	207,102950235891	63,807650572362
miR827-3p	UUAGAUGACCAUCAGCAAACA	21	2439	2313	2063	1598	2950,99174502484	1342,56090327192	2573,81558034123	2169,46011946031
miR827-5p	UUUGUUGGUGGUCAUUUAACC	21	211	187	146	148	255,292848790587	108,542537359208	182,150787556868	200,926218823608
miR9773	UUUGUUUUUAUGUUAUUUUGUGAA	24	2246	2773	2665	5118	2717,47743309791	1609,56393634804	3324,87567697982	6948,24586445423
miR9774	CAAGAUAUUGGGUAUUUCUGUC	22	436	307	446	246	527,524559586237	178,195502509502	556,433227742214	333,971958314916
miR9774*	CAGAAAUACCCAAUAUCUUG	20	3798	3688	3809	695	4595,27127823057	2140,66779561903	4752,13938221994	943,53866271897

## Sheet: pre-miRNAs
miRNA	sequence	miRNA length	miRNA*	sequence	miRNA* length	Transcript	Pre-miRNA sequence	miRNA start	miRNA end	miRNA* start	miRNA* end	Pre-miRNA length	%GC	MFE pre-miRNA (kcal/mol)	AMFE pre-miRNA	MFEI pre-miRNA	Number of isoforms	Isoforms
miR156k	UGACAGAAGAGAGAGAGCACA	21				TR10517_c0_g1	AAUGACAGUGAGAGCAGAGAGCACACGGCCCUCGCAGAAGCGAGCCGUCCUCGCUGGUGCUGGGUUGUGCUCUCUCUCUUCUGUCAU	3	25	66	86	87	58.6207	-52.3	-60.1149	-1.02549	2	TR10517|c0_g1_i1
																		TR10517|c0_g1_i2
miR169n	UAGCCAAGAAUGACUUGCCUA	21				TR10924_c1_g1	UCUCUAUUAGCCAAGAAUGGCUUGCCUAUCUCCACUAUUUGGUUCAUAAGGGAUUCGGAGUCCUGAUGAUGGAUGAAAUGUGGAUGAUGGCGAGCCUUCUUCGGCUAAGAGAGU	8	26			114	45.614	-58	-50.8772	-1.11538	3	TR10924|c1_g1_i2
																		TR10924|c1_g1_i3
																		TR10924|c1_g1_i4
miR9774	CAAGAUAUUGGGUAUUUCUGUC	22	miR9774*	CAGAAAUACCCAAUAUCUUG	20	TR14329_c3_g1	AAAGCCAGAAAUACCCAAUAUCUUGUUCCAACAGGAUAUUGGGUAUUUCUUUGUUUAUUC	32	51	5	26	60	33.3333	-29.5	-49.1667	-1.475	6	TR14329|c3_g1_i1
																		TR14329|c3_g1_i2
																		TR14329|c3_g1_i3
																		TR14329|c3_g1_i4
																		TR14329|c3_g1_i7
																		TR14329|c3_g1_i8
miR167d-3p	AGGUCAUGCUGUAGUUUCAUC	21	miR167d-5p	UGAAACUGCCAGCAUGAUCUGA	22	TR14384_c0_g1	GAAGCUGCCAGCAUGAUCUGAUGCUAUCCUGCUUCACCACUCUCGCCUGACACAGGAUGAGGUGUAAGAGGAAGCAGCUGCUGAAUUAACCAGGUCAUGCGGUAGUUUCAU	92	110	1	20	111	50.4505	-49.2	-44.3243	-0.878571	1	TR14384|c0_g1_i1
miR395a	GUGAAGUGUUUGGGGGAACUC	21				TR16038_c0_g1	ACCAAGAGUUCCCCCAAACACUUCACAUUGGUUUCAAAGCUUACUCCAGGGCAACCAAAACUCCAUGUGAAGUGCUUGAAGGGAACUCCUGG	67	88			92	47.8261	-37.8	-41.087	-0.859091	1	TR16038|c0_g1_i2
miR395a	GUGAAGUGUUUGGGGGAACUC	21				TR16038_c0_g1	UAGAGUUCCCCCCAAACACUUCACUAGUCUGGGGUAAGCCCUACAUUGUGCAGCUGUAUUAAAGCCGAGCUGCUGAAGUGUUUGGAGGGAACUC	74	94			94	50	-47	-50	-1	1	TR16038|c0_g1_i2
miR398b-5p	GGGGCGGACUGGGAACACAUG	21	miR398b-3p	UGUGUUCUCAGGUCGCCCCUG	21	TR18687_c0_g1	AGCAAGGAGGGCCCGGCGGGGGCGACCUGAGAACACAUGCGGCUGCGGGCGGUGACGCUCCAGGUCACCGCGACCAAGCCAUGUGUUCCCAGUCCGCCCCUGCCGGGAGCUCCUUGCG	19	39	82	102	118	71.1864	-87.3	-73.9831	-1.03929	1	TR18687_c0_g1_i1
miR444b	UGCAGUUGUUGUCUCAAGCUU	21	miR444a-3p	UGCAGUUGCUGCCUCAAGCUU	21	TR20685_c2_g3	GGAGGCAGCAAGCUUGAGACAACAACUGCACAACCUGCAAGAAAGUCAUCGGUAUGGCUAGAAAACCGAUUUUCUUGCAAGUUAUGCAGUUGUUAUCUCUAGCUUGCCGCCUCCA	85	106			115	46.9565	-67.4	-58.6087	-1.24815	3	TR20685_c2_g3_i1
																		TR20685_c2_g3_i2
																		TR20685_c2_g3_i3
miR162a-3p	UCGAUAAACCUCUGCAUCCAG	21	miR162a-5p	GGGCGCAGUGGUUUAUCGAUC	21	TR21382_c0_g1	AGCUGGAUGCAGAGGUUUAUCGAUCGAUUCCCGCGUUGUGGUCCGCUGCAGCAAGAAACCUCUCCAAGAAUUCGAACCACCUUCCAAUCCCGGAUCAGCACAAGGCAGGGAAGUGAUCGAUAAACCACUGCGUCCAGC	117	138	5	25	138	53.6232	-62.7	-45.4348	-0.847297	1	TR21382|c0_g1_i1
miR444a-3p	UGCAGUUGCUGCCUCAAGCUU	21				TR21522_c1_g2	AGCAGCAAGCCUGAGUCAACAACUGCACAACUUGCAAGAAAGCUACAAGUAAGACCUUCCAAUUGAUCUUGCAAGUGAUGCAGUUCCUGCCUCAUGCUUGGUGC	79	100			104	47.1154	-43.2	-41.5385	-0.881633	3	TR21522|c1_g2_i1
																		TR21522|c1_g2_i2
																		TR21522|c1_g2_i4
miR169n	UAGCCAAGAAUGACUUGCCUA	21				TR21736_c1_g1	UAGAGCCAAGAAUGACUUGCCUAUGCAUGCCUUCUGUUAGCAGCUCCAACAACCAUGGCAAUGUGAAUAGAGAAAUUCUUAUGAUGCGAUGCAAUGUGGCUGCACGGGCAGGUCUUCUUGGCUCUU	4	21			126	46.8254	-53.6	-42.5397	-0.908475	1	TR21736|c1_g1_i3
miR169g	UAGCCAAGGAUGACUUGCCUA	21				TR21736_c1_g3	AUUUGGUGAGCCAAGAAUGACUUGCCUAUUGCAUUCCUUCUGUUAGCAGCUCCAAUGGCCAUGGCAGUGGGAAGAGAUAUUCUUAUGAUGGGAUGCAAUGUGGCUGCAUAGGCAGGUCUUCUUGGCUCACCAGA	9	29			134	47.7612	-64.8	-48.3582	-1.0125	1	TR21736|c1_g3_i1
miR164a-5p	UGGAGAAGCAGGGCACGUGCA	21	miR164a-3p	AUGUGCCCAUCUUCUCCACC	20	TR2238_c0_g1	GGCGAGGUGUGCGAGGUGGAGAAGCAGGGCACGUGCAUGCGUUCUUUCCUCUCGGCUCUCGCCGGUAUGGCAUUCCGGCCGGCUUGCGCCCGAGAGGGCUCUUCACCGCCGGUCGGCCGGCCGGCCGGCUAGUUCCUGAAGCAGCUGAUGCCAUGCAUGUGCCCAUCUUCUCCACCGUGCACGCCUCGCCU	17	40	157	176	191	67.0157	-122.3	-64.0314	-0.955469	1	TR2238|c0_g1_i1
miR164a-5p	UGGAGAAGCAGGGCACGUGCA	21	miR164a-3p	AUGUGCCCAUCUUCUCCACC	20	TR2238_c0_g2	GGCGAGGUGUGCGAGGUGGAGAAGCAGGGCACGUGCAUGCGUUCUUUCCUCUCGGCUCUCGCCGGUAUGGCAUUCCGGCCGGCUUGCGCCCGAGAGGGCUCUUCACCGCCGGUCGGCCGGCCGGCCGGCUAGUUCCUGAAGCAGCUGAUGCCAUGCAUGUGCCCAUCUUCUCCACCGCUCACGCCUCGCCU	17	40	157	176	191	67.0157	-122.3	-64.0314	-0.955469	1	TR2238|c0_g2_i1
miR167d-5p	UGAAACUGCCAGCAUGAUCUGA	21	miR167d-3p	AGGUCAUGCUGUAGUUUCAUC	21	TR23433_c0_g1	GGUGAAGCUGCCAGCAUGAUCUGAUGCUAUCCUGUUCCACCACUCUCCUGACACAGGAUGAGGUGAAAGAGGAAGCAGCUGCAGAAUUAGUCAGGUCAUGCUGUAGUUUCAUCU	3	25	93	113	114	49.1228	-55.4	-48.5965	-0.989286	1	TR23433|c0_g1_i1
miR393-5p	UUCCAAAGGGAUCGCAUUGAU	21	miR393b-3p	AUCAGUGCAAUCCCUUUGGAAU	22	TR24031_c1_g1	UAGUGGAGGACUCCAAAGGGAUCGCAUUGAUCCCACCUGCGCUGCAUGCUUAAUCAGCUCGCUGCCGCCGGCAUGGAAGCACACGUAUAUAUGCAUGUCACAGAUGGAUGCGUGCAUGGCUGCGCGUGAGGACAAGAUCAAUGCAAUCCCUUUGGAAUUUUCCACUU	12	32	137	156	167	52.0958	-75	-44.9102	-0.862069	1	TR24031|c1_g1_i1
miR393a	UCCAAAGGGAUCGCAUUGAUUC	22				TR24031_c1_g2	UAGUGGAGGACUCCAAAGGGAUCGCAUUGAUCUUUCAGGAAGCUAGUGGAGGACUCCAAAGGGAUCGCAUUGAUCUCACCUGCUGCCGCCGCCGGCAUGCAAGCACACGUACGCAUGUCACAGAUGCUUGCGUGCGAGCGUGCGUGCGCGCGAGGACAAGAUCAGUGCAAUCCCUUUGGAAUUUUCCACUU	12	34			191	54.9738	-97.2	-50.8901	-0.925714	3	TR24031|c1_g2_i1
																		TR24031|c1_g2_i2
																		TR24031|c1_g2_i3
miR393-5p	UUCCAAAGGGAUCGCAUUGAU	21	miR393b-3p	AUCAGUGCAAUCCCUUUGGAAU	22	TR24031_c1_g2	UAGUGGAGGACUCCAAAGGGAUCGCAUUGAUCUCACCUGCUGCCGCCGCCGGCAUGCAAGCACACGUACGCAUGUCACAGAUGCUUGCGUGCGAGCGUGCGUGCGCGCGAGGACAAGAUCAGUGCAAUCCCUUUGGAAUUUUCCACUU	12	33	118	137	148	56.7568	-86.1	-58.1757	-1.025	3	TR24031|c1_g2_i1
																		TR24031|c1_g2_i2
																		TR24031|c1_g2_i3
miR169g	UAGCCAAGGAUGACUUGCCUA	21	miR169c-3p	GGCAAGUCUGUCCUUGGCUACA	22	TR3538_c0_g1	UAGCAUGAGCAAUAAGAGCCACUCAGGCUAGCCAAGGAGACUGCCCAUGAGACCACUCAAAGGCUCAUUGUUUUGCUGAUCCUUUAGGGAGGACACAGGCAAGUCAUCCUUGGCUACCAGAGCCAAGCUCUUGUCGCCAUGUAA	29	47	98	118	144	50.6944	-63.1	-43.8194	-0.864384	2	TR3538|c0_g1_i1
																		TR3538|c0_g1_i2
miR169g	UAGCCAAGGAUGACUUGCCUA	21	miR169c-3p	GGCAAGUCUGUCCUUGGCUACA	22	TR3538_c0_g2	AGGAUAGCCAAGGAGACUGCCCAUGAGAUCACUCAAAGGCUCAUCGAUCGAUCAUUUGCUGGUCGAUGAUCCUUGAGGGAGGACGGACACAGGCAAGUCAUCCUUGGCUACCA	5	23	92	112	113	52.2124	-50.9	-45.0442	-0.862712	1	TR3538|c0_g2_i1
miR169g	UAGCCAAGGAUGACUUGCCUA	21				TR3538_c1_g1	UAGCCAAGGAUGACUUGCCUGUGCCCUCUCUGAAGGAUCAGUGAACAAUGAGGCUUUAAGUGGUCUCACGGGCAGUCUCCUUGGCUA	1	23			87	51.7241	-43.5	-50	-0.966667	3	TR3538|c1_g1_i1
																		TR3538|c1_g1_i2
																		TR3538|c1_g1_i3
miR395a	GUGAAGUGUUUGGGGGAACUC	21				TR3796_c0_g1	GUUGGUUGUCACCUGAAGUUCUCCUCAAACCACUUCAGUAGCAGCAGCUGAUUUCGCGGCCACUUUUGCAUAUCCGUGUGCAUGGAGGCCAACAGAGAGCUGCAGUUGCGUACAUAGUGAAGUGUUUGGGGGAACUCUGGGUGGCAAGCAGCA	117	136			153	52.2876	-74	-48.366	-0.925	2	TR3796|c0_g1_i1
																		TR3796|c0_g1_i2
miR395a	GUGAAGUGUUUGGGGGAACUC	21				TR3796_c0_g1	UUUUGUGAAGUGUUUGGGGGAACUCUAGGUGUCACUAAACAUUUAGCCUAUGUUGGUCACAUGCCACAUGAGAUGAGGUAACAAUGGAUCCAUCAUGUUUGGUAUUACCAGGAGUUCCCUGCAAGCACUUUACGAGA	5	26			137	43.0657	-57.5	-41.9708	-0.974576	2	TR3796|c0_g1_i1
																		TR3796|c0_g1_i2
miR395a	GUGAAGUGUUUGGGGGAACUC	21				TR3796_c0_g1	UUUGGUAUUACCAGGAGUUCCCUGCAAGCACUUUACGAGACCUUGGCUCGAGGGCUCUUGUGAAGUAUUUGGGGGAACUCUCGGUGUCACCAAAU	60	80			95	49.4737	-49.2	-51.7895	-1.04681	2	TR3796|c0_g1_i1
																		TR3796|c0_g1_i2
miR395a	GUGAAGUGUUUGGGGGAACUC	21				TR3796_c0_g1	AUGUUCGGUGUUACCAUGAGUUUCCUUCGAGCACUUCAUGUGGAACUAUUCAAAUUACUCUCUCUAGAGUUUUGUGCAUUGUGAAGUGUUUGGGGAACUCUCGGUGAUACUCAACAUU	81	100			118	40.678	-46.4	-39.322	-0.966667	2	TR3796|c0_g1_i1
																		TR3796|c0_g1_i2
miR395a	GUGAAGUGUUUGGGGGAACUC	21				TR3796_c0_g1	UUUGGUAUUACCAGGAGUUCCUGCAAGCACUUCACGAGGCCUUGGCUAGAGGGCUCUUGUGAAGUAUUUGGGGGAACUCUCGGUAUCAUCAAAU	59	79			94	47.8723	-53	-56.383	-1.17778	2	TR3796|c0_g1_i1
																		TR3796|c0_g1_i2
miR395a	GUGAAGUGUUUGGGGGAACUC	21				TR3796_c0_g1	AUGAGUUUCCUUCAAGCACUUCUCUAUGAGUUUUUUGUGCAAUGUGAAGUGUUUGGGGGAACUCU	44	64			65	40	-26	-40	-1	2	TR3796|c0_g1_i1
																		TR3796|c0_g1_i2
miR169g	UAGCCAAGGAUGACUUGCCUA	21	miR169c-3p	GGCAAGUCUGUCCUUGGCUACA	22	TR4450_c0_g1	AGCCAAGGAUGACUUGCCGAUCGAUGAUACCUGUGAUCGUCAGAUUGAUGCGUGUUUGUUUGGUCAUCGGCAAGUUGUCCUUGGCUA	1	20	69	87	87	48.2759	-43.3	-49.7701	-1.03095	1	TR4450|c0_g1_i1
miR156j-5p.2	UGACAGAAGAGAGCGAGCAC	20	miR156j-5p.2*	UGUGCUCGCUCUCUUCUGUCA	21	TR4593_c5_g1	GGAGAGGCUGACAGAAAGAGGAGCGAGCACGCGGCGGAGACGGCCGGUGCCGGCCGCCGCGCCGUGUGCUCGCUCUCUUCUGUCAAUCUCUUCA	9	31	65	85	94	67.0213	-70.8	-75.3191	-1.12381	1	TR4593|c5_g1_i1
miR156j-5p.2	UGACAGAAGAGAGCGAGCAC	20	miR156j-5p.2*	UGUGCUCGCUCUCUUCUGUCA	21	TR4593_c5_g2	GGAGAGGCUGACAGAGAGAGGAGCGAGCACGCGGCGGGGACGGCACCCGUCCGGUGCCGGCCGCCGCGCCGUGUGCUCGCUCUCUUCUGUCAAUCUCUUCA	9	31	72	92	101	69.3069	-75.6	-74.8515	-1.08	13	TR4593|c5_g2_i1
																		TR4593|c5_g2_i10
																		TR4593|c5_g2_i11
																		TR4593|c5_g2_i12
																		TR4593|c5_g2_i14
																		TR4593|c5_g2_i15
																		TR4593|c5_g2_i16
																		TR4593|c5_g2_i17
																		TR4593|c5_g2_i2
																		TR4593|c5_g2_i3
																		TR4593|c5_g2_i5
																		TR4593|c5_g2_i7
																		TR4593|c5_g2_i8
miR169g	UAGCCAAGGAUGACUUGCCUA	21				TR4646_c1_g1	AUAGCCAAGGAUGACUUGCCUAUGUCCUUUGUACCGAAGGAUAAGCAAUGUGAGCCUUUGAGAUGGUUCAUGGGCAAGUUUCCUUGGCUA	2	21			90	45.5556	-46.5	-51.6667	-1.13415	9	TR4646|c1_g1_i1
																		TR4646|c1_g1_i11
																		TR4646|c1_g1_i12
																		TR4646|c1_g1_i2
																		TR4646|c1_g1_i3
																		TR4646|c1_g1_i4
																		TR4646|c1_g1_i5
																		TR4646|c1_g1_i7
																		TR4646|c1_g1_i9
miR172d-5p	GCAGCACCAUCAAGAUUCAG	21	miR172b	GGAAUCUUGAUGAUGCUGCAU	21	TR4757_c0_g2	AUGCAGCAUCAUCAAGAUUCUCAUCAUAUAUACAUGUUUAUAUGGAAACUGCAAACCACCUCUCUCGAGAUGAGUUUCGAUGUGAAUCUUGAUGGUGCUGCA	3	20	84	102	102	39.2157	-43.2	-42.3529	-1.08	1	TR4757|c0_g2_i1
miR169g	UAGCCAAGGAUGACUUGCCUA	21				TR5402_c11_g2	AUAGCCAAGGAUGACUUGCCUGUGUCCUUUGUCCUGAAGGAUCAGCAAUGCAAGACUUUGAUUGGUUCAUAGGCAGUCUCCUUGGCUA	2	24			88	46.5909	-38.1	-43.2955	-0.929268	3	TR5402|c11_g2_i1
																		TR5402|c11_g2_i2
																		TR5402|c11_g2_i4
miR169g	UAGCCAAGGAUGACUUGCCUA	21				TR5402_c9_g1	GGGGCCUUGCAUGAGGGCCAGAGCCUGCCUCUGGUAGCCAAGGAUGACUUGCCUACAUGUCCCAGCGAGUCCCGGUUGCAUGGCCGGUUCAGUUGUAUGUGUGGGCGGUCUCCUUGGCUAGCCUGAGUGGCUCUUGCCUGUCAUGGAAGGCCUCU	35	58			155	60.6452	-95.4	-61.5484	-1.01489	1	TR5402|c9_g1_i1
miR528-5p	UGGAAGGGGCAUGCAGAGGAG	21	miR528-3p	CCUGUGCCUGCCUCUUCCAUU	21	TR5500_c0_g1	UGUAGCAGCAGCAGUGGAAGGGGCAUGCAGAGGAGCAGGAGGUCUGGUUUCAAGCUGACCUGUGCCUCGCUCCGUCUCCUGUGCCUGCCUCUUCCAUUCCUGCUGCUACG	15	38	78	98	110	60	-67.8	-61.6364	-1.02727	3	TR5500|c0_g1_i1
																		TR5500|c0_g1_i2
																		TR5500|c0_g1_i3
miR167d-5p	UGAAACUGCCAGCAUGAUCUGA	22	miR167-3p.1	GAUCAUGCUGUGCGGUUUCAUC	22	TR6998_c4_g4	UGAAGCUGCCAGCAUGAUCUGAACUCAGGGAAACAUUAGUGAUCAAAGCUAACUUUCAGAUCAUGCUGUGCGGUUUCAU	1	23	59	78	79	43.038	-35.8	-45.3165	-1.05294	2	TR6998|c4_g4_i1
																		TR6998|c4_g4_i2
miR160f	UGCCUGGCUCCCUGAAUGCCA	21				TR9016_c1_g2	AGCCUGCAUGACUCCCUCAAUGCCAACCAGGAGGCACGCCAGCCACGGUGGCAUUGCUUCUCGGAUGGCAUUCAGGGAGCCAGGCAGGCA	5	25	68	88	90	62.2222	-54.8	-60.8889	-0.978571	1	TR9016|c1_g2_i1
miR444a-3p	UGCAGUUGCUGCCUCAAGCUU	21				TR9439_c1_g1	UAUAUGCAGUUAUGGCUGCAAAGUUAUACAUCUAUGUUAAUUGAAAGCUCUGUAUCUUACUAGCUUUGGCAAAGGGAGGCAGGAAGCUUGAGGCAGCAACUGCAUAACUUGCAAGAGCACCAUCGGUAUGAUCUCAACCAACAAGCUCUUGCAAGUUAUGCAGUUGCCGCCCUCAACCAACAAGCUCUUGCAAUUUAUGCAGUUGCUGCAUCUAGCU	198	217			217	43.7788	-85.4	-39.3548	-0.898947	2	TR9439|c1_g1_i1
																		TR9439|c1_g1_i2
miR444a-5p	GCUAGAGGCGGCAACUGCAUA	21				TR9439_c1_g1	AAGCUUGAGGCAGCAACUGCAUAACUUGCAAGAGCACCAUCGGUAUGAUCUCAACCAACAAGCUCUUGCAAGUUAUGCAGUUGCCGCCCUCAA	3	24			93	48.3871	-52.2	-56.129	-1.16	2	TR9439|c1_g1_i1
																		TR9439|c1_g1_i2
miR159b	UUUGGAUUGAAGGGAGCUCUG	21	miR159b-3p	UUUGCAUGACCGAGGAGCCGC	21	TR9981_c0_g1	AGCGGGGCUCCUAUCAUUCCAAUGAAGGGUCCAUUCAAAGGGUGGUACAGCUGCUCGUUCAUGGUUGCCACUAUCCUUUCUCAUUAGAGAGAACAGAGGUUUAGAGAGAUGAGCUGCUGUCUUUGAGAUAGGCUUGUGGUUUGCAUGACCGAGGAGCUGCAUCGUCCCGUAGUUGACCACUUUUUGGAUUGAAGGGAGCUCUGCA	183	204	140	159	205	49.2683	-100.9	-49.2195	-0.99901	2	TR9981|c0_g1_i1
																		TR9981|c0_g1_i2
miR319a	UUGGACUGAAGGGAGCUCCCU	21				TR9981_c0_g1	AGCGGGGCUCCUAUCAUUCCAAUGAAGGGUCCAUUCAAAGGGUGGUACAGCUGCUCGUUCAUGGUUGCCACUAUCCUUUCUCAUUAGAGAGAACAGAGGUUUAGAGAGAUGAGCUGCUGUCUUUGAGAUAGGCUUGUGGUUUGCAUGACCGAGGAGCUGCAUCGUCCCGUAGUUGACCACUUUUUGGAUUGAAGGGAGCUCUGCA	183	204			205	49.2683	-100.9	-49.2195	-0.99901	2	TR9981|c0_g1_i1
																		TR9981|c0_g1_i2
miR396b	UUCCACAGCUUUCUUGAACU	20				TR30869_c2_g2	GGGGUCAUUUGAACGUAUGGUGUUGCUCAAGGUCCUUGACCUUUCUGCAACUUCCAUCACUUUCUUGACCUCA	52	71			73	46.5753	-30.2	-41.3699	-0.888235	1	TR30869|c2_g2_i1
miR159a-3p	CUUGGAUUGAAGGGAGCUCU	20				TR5398_c6_g1	UUGGAAUGAAGGGAGCUCCAUCUUCAUGGGACUUUGUAUAGUCCCAGAAGCGUAGAGGUUGCCAUCGAAUAUUGGAUGGCCACUGACAAUGGCACUACCAAGAGGUGCCAACUGAGACUCUGUCGUCAUUCCAU	1	18			134	48.5075	-55	-41.0448	-0.846154	5	TR5398|c6_g1_i2
																		TR5398|c6_g1_i3
																		TR5398|c6_g1_i5
																		TR5398|c6_g1_i4
																		TR5398|c6_g1_i6
miR319a	UUGGACUGAAGGGAGCUCCCU	21				TR5398_c6_g1	UUGGAAUGAAGGGAGCUCCAUCUUCAUGGGACUUUGUAUAGUCCCAGAAGCGUAGAGGUUGCCAUCGAAUAUUGGAUGGCCACUGACAAUGGCACUACCAAGAGGUGCCAACUGAGACUCUGUCGUCAUUCCAU	1	18			134	48.5075	-55	-41.0448	-0.846154	5	TR5398|c6_g1_i2
																		TR5398|c6_g1_i3
																		TR5398|c6_g1_i5
																		TR5398|c6_g1_i4
																		TR5398|c6_g1_i6
miR528-5p	UGGAAGGGGCAUGCAGAGGAG	21				TR28729_c1_g1_i4	UUUGUUCCUGCUGUACUCUUUCUCCAACAUGGAAGAGAGCUUGCAGAGGAGCGACUCCAU	30	51			60	48.3333	-25	-41.6667	-0.862069	3	TR28729|c1_g1_i4
																		TR28729|c1_g1_i6
																		TR28729|c1_g1_i7
miR6222-3p	CUAGCUGAUCCAAACAGGCCC	21				TR2840|c0_g3_i8	AACUAUGCUGAUCCAAACACCCAUUCUGACUUUUGGAAGAAGUGGAAUGACUUUGAGAUCCAGCAUGGUA	3	22			70	41.4286	-25.2	-36	-0.868966	1	TR2840|c0_g3_i8
miR444a-5p	GCUAGAGGCGGCAACUGCAUA	21	miR444b	UGCAGUUGUUGUCUCAAGCUU	21	TR3592_c0_g1	ACAAGCUAGAGGCAGCAACUGCAUAUCUUGCAAGAAAAUUGGUUUUCGGACCAUACCGAUGAUUUUCUUGCAAGUUGUGCAGUUGUUGUCUCAAGCUUG	5	25	78	99	99	42.4242	-60.1	-60.7071	-1.43095	2	TR3592|c0_g1_i1
																		TR3592|c0_g1_i2
												118.872		-60.3383		-1.00085
												60		-122.3		-1.475
												217		-25		-0.846154

## Sheet: Cleaveland_results
miRNA	CleaveLand category	p-value	Slice site	Gene	Target transcript annotation	Number of target transcript soforms	Target transcript isoforms
miR1128	4	0.59043	1913	TR17277|c0_g1	uncharacterized protein LOC100276777	3	TR17277|c0_g1_i1
							TR17277|c0_g1_i2
							TR17277|c0_g1_i4
miR1128	2	0.0821373	2293	TR24300|c7_g1	senescence-associated partial	9	TR24300|c7_g1_i11
							TR24300|c7_g1_i2
							TR24300|c7_g1_i3
							TR24300|c7_g1_i4
							TR24300|c7_g1_i5
							TR24300|c7_g1_i6
							TR24300|c7_g1_i7
							TR24300|c7_g1_i8
							TR24300|c7_g1_i9
miR156d-3p	2	0.0367725	1749	TR4471|c1_g1	32 kDa (dirigent-like)	8	TR4471|c1_g1_i1
							TR4471|c1_g1_i2
							TR4471|c1_g1_i3
							TR4471|c1_g1_i4
							TR4471|c1_g1_i5
							TR4471|c1_g1_i6
							TR4471|c1_g1_i7
							TR4471|c1_g1_i8
miR156j-5p.2	0	0.0070448	1819	TR14474|c4_g2	hypothetical protein SETIT_036744mg	4	TR14474|c4_g2_i2
							TR14474|c4_g2_i3
							TR14474|c4_g2_i5
							TR14474|c4_g2_i6
miR156k	4	0.0616796	1656	TR121|c0_g1	hypothetical protein BAE44_0019757	2	TR121|c0_g1_i3
							TR121|c0_g1_i5
miR159a-3p	3	0.0554557	22	TR5918|c0_g1	---NA---	1	TR5918|c0_g1_i1
miR159b	3	0.0583697	810	TR24324|c4_g3	---NA---	8	TR24324|c4_g3_i1
							TR24324|c4_g3_i10
							TR24324|c4_g3_i2
							TR24324|c4_g3_i3
							TR24324|c4_g3_i4
							TR24324|c4_g3_i5
							TR24324|c4_g3_i7
							TR24324|c4_g3_i8
miR159b	0	0.0586826	317	TR30640|c3_g1	---NA---	1	TR30640|c3_g1_i1
miR159e	2	0.0245048	1773	TR11309|c1_g1	BEL1-like homeodomain 4	4	TR11309|c1_g1_i3
							TR11309|c1_g1_i4
							TR11309|c1_g1_i5
							TR11309|c1_g1_i6
miR159e	3	0.0463437	5856	TR4218|c1_g1	PREDICTED: uncharacterized protein LOC101753284 isoform X1	10	TR4218|c1_g1_i10
							TR4218|c1_g1_i11
							TR4218|c1_g1_i13
							TR4218|c1_g1_i14
							TR4218|c1_g1_i15
							TR4218|c1_g1_i2
							TR4218|c1_g1_i3
							TR4218|c1_g1_i4
							TR4218|c1_g1_i7
							TR4218|c1_g1_i8
miR159e	0	0.0655818	739	TR6528|c0_g1	ankyrin repeat domain-containing 13B	1	TR6528|c0_g1_i3
miR164f-3p	4	0.895302	565	TR23613|c0_g2	glutamic acid-rich -like	1	TR23613|c0_g2_i1
miR164f-3p	4	0.831113	50	TR25003|c1_g1	DNA topoisomerase 2	1	TR25003|c1_g1_i1
miR167c-5p	2	0.00450076	2143	TR29148|c1_g1	ATP synthase delta chloroplastic	4	TR29148|c1_g1_i1
							TR29148|c1_g1_i2
							TR29148|c1_g1_i3
							TR29148|c1_g1_i4
miR167d-3p	4	0.722353	307	TR1390|c1_g1	FT-interacting 1-like	4	TR1390|c1_g1_i2
							TR1390|c1_g1_i4
							TR1390|c1_g1_i8
							TR1390|c1_g1_i9
miR167d-3p	4	0.657488	152	TR15151|c0_g2	mitochondrial substrate carrier family C-like	1	TR15151|c0_g2_i1
miR167i-3p	4	0.440718	1158	TR12479|c2_g2	TPA: aldo keto reductase family	4	TR12479|c2_g2_i1
							TR12479|c2_g2_i2
							TR12479|c2_g2_i3
							TR12479|c2_g2_i4
miR167i-3p	4	0.235246	1488	TR1478|c2_g1	trihelix transcription factor	5	TR1478|c2_g1_i2
							TR1478|c2_g1_i3
							TR1478|c2_g1_i5
							TR1478|c2_g1_i6
							TR1478|c2_g1_i7
miR169a	4	0.105127	315	TR20682|c0_g1	CLP1 homolog	2	TR20682|c0_g1_i1
							TR20682|c0_g1_i4
miR169c-3p	2	0.0511476	5268	TR24300|c7_g1	senescence-associated partial	9	TR24300|c7_g1_i11
							TR24300|c7_g1_i2
							TR24300|c7_g1_i3
							TR24300|c7_g1_i4
							TR24300|c7_g1_i5
							TR24300|c7_g1_i6
							TR24300|c7_g1_i7
							TR24300|c7_g1_i8
							TR24300|c7_g1_i9
miR169c-5p	4	0.366492	1650	TR13559|c0_g2	transcription factor VOZ1-like	2	TR13559|c0_g2_i1
							TR13559|c0_g2_i3
miR169n	4	0.145405	2148	TR23643|c0_g1	regulatory family	3	TR23643|c0_g1_i2
							TR23643|c0_g1_i4
							TR23643|c0_g1_i5
miR172	4	0.0830398	4788	TR6995|c0_g2	pre-mRNA-processing 40A	4	TR6995|c0_g2_i10
							TR6995|c0_g2_i5
							TR6995|c0_g2_i6
							TR6995|c0_g2_i8
miR172b	3	0.0855076	1128	TR25857|c1_g1	hypothetical protein SETIT_019819mg	1	TR25857|c1_g1_i1
miR172d-5p	3	0.036187	294	TR29998|c0_g1	pentatricopeptide repeat-containing At1g18485	1	TR29998|c0_g1_i1
miR172d-5p	4	0.379234	243	TR6447|c0_g2	---NA---	2	TR6447|c0_g2_i1
							TR6447|c0_g2_i2
miR1878-3p	4	0.0306743	24	TR25489|c2_g1	---NA---	1	TR25489|c2_g1_i1
miR2118a	4	0.656559	1002	TR5258|c2_g1	multiple myeloma tumor-associated 2 homolog	4	TR5258|c2_g1_i1
							TR5258|c2_g1_i2
							TR5258|c2_g1_i3
							TR5258|c2_g1_i4
miR2118d	4	0.693495	320	TR18368|c0_g1	NADH dehydrogenase subunit 5 (mitochondrion)	1	TR18368|c0_g1_i1
miR2118d	4	0.616213	3807	TR24980|c2_g1	lipoxygenase chloroplastic-like	4	TR24980|c2_g1_i1
							TR24980|c2_g1_i2
							TR24980|c2_g1_i6
							TR24980|c2_g1_i7
miR2118d	4	0.0867584	2055	TR28818|c0_g1	pro-resilin precursor	3	TR28818|c0_g1_i1
							TR28818|c0_g1_i3
							TR28818|c0_g1_i8
miR2118h	4	0.21637	249	TR13083|c2_g1	---NA---	1	TR13083|c2_g1_i1
miR2118h	4	0.651875	2934	TR13300|c0_g1	hypothetical protein BAE44_0005248	6	TR13300|c0_g1_i10
							TR13300|c0_g1_i11
							TR13300|c0_g1_i2
							TR13300|c0_g1_i3
							TR13300|c0_g1_i5
							TR13300|c0_g1_i9
miR2275a	4	0.857612	885	TR1206|c6_g1	membrane {ECO:0000313	5	TR1206|c6_g1_i12
							TR1206|c6_g1_i6
							TR1206|c6_g1_i7
							TR1206|c6_g1_i8
							TR1206|c6_g1_i9
miR2275a	4	0.618803	2450	TR27384|c0_g1	Alpha-1,4 glucan phosphorylase L chloroplastic amyloplastic	3	TR27384|c0_g1_i1
							TR27384|c0_g1_i2
							TR27384|c0_g1_i4
miR319a	3	0.0338442	1578	TR1733|c1_g2	calcineurin B 1	6	TR1733|c1_g2_i1
							TR1733|c1_g2_i4
							TR1733|c1_g2_i5
							TR1733|c1_g2_i6
							TR1733|c1_g2_i7
							TR1733|c1_g2_i9
miR319b-3p	4	0.00943704	533	TR10512|c0_g1	SHORT-ROOT 1	1	TR10512|c0_g1_i1
miR319b-3p	4	0.385925	660	TR17277|c0_g1	Chitin synthase partial	3	TR17277|c0_g1_i1
							TR17277|c0_g1_i2
							TR17277|c0_g1_i4
miR319b-3p	0	0.0263957	1317	TR24557|c0_g1	---NA---	8	TR24557|c0_g1_i1
							TR24557|c0_g1_i10
							TR24557|c0_g1_i2
							TR24557|c0_g1_i3
							TR24557|c0_g1_i6
							TR24557|c0_g1_i7
							TR24557|c0_g1_i8
							TR24557|c0_g1_i9
miR390-3p	4	0.487855	304	TR15572|c0_g1	---NA---	1	TR15572|c0_g1_i1
miR390-3p	4	0.473078	458	TR26417|c0_g1	basic salivary proline-rich 4-like	1	TR26417|c0_g1_i1
miR390-5p	4	0.51814	2819	TR20258|c0_g1	far upstream element-binding 1	3	TR20258|c0_g1_i3
							TR20258|c0_g1_i4
							TR20258|c0_g1_i5
miR390-5p.1	4	0.160322	2465	TR13346|c1_g1	magnesium-protoporphyrin IX monomethyl ester [oxidative] chloroplastic	7	TR13346|c1_g1_i2
							TR13346|c1_g1_i3
							TR13346|c1_g1_i5
							TR13346|c1_g1_i6
							TR13346|c1_g1_i7
							TR13346|c1_g1_i8
							TR13346|c1_g1_i9
miR394	4	0.842599	2529	TR30725|c3_g1	abscisic stress ripening	9	TR30725|c3_g1_i1
							TR30725|c3_g1_i10
							TR30725|c3_g1_i11
							TR30725|c3_g1_i12
							TR30725|c3_g1_i13
							TR30725|c3_g1_i2
							TR30725|c3_g1_i3
							TR30725|c3_g1_i4
							TR30725|c3_g1_i9
miR394	4	0.582023	266	TR4637|c0_g1	somatic embryogenesis receptor kinase 1	2	TR4637|c0_g1_i1
							TR4637|c0_g1_i2
miR396b	4	0.0306743	896	TR13575|c0_g1	UDP-glucose 4- partial	1	TR13575|c0_g1_i1
miR396b	2	0.0619056	1610	TR20898|c2_g2	chlorophyll a-b binding chloroplastic-like	3	TR20898|c2_g2_i1
							TR20898|c2_g2_i3
							TR20898|c2_g2_i4
miR396b	4	0.517487	102	TR22002|c5_g1	conserved	1	TR22002|c5_g1_i3
miR396e	4	0.198116	1440	TR21592|c0_g1	CURVATURE THYLAKOID chloroplastic	9	TR21592|c0_g1_i1
							TR21592|c0_g1_i12
							TR21592|c0_g1_i2
							TR21592|c0_g1_i3
							TR21592|c0_g1_i4
							TR21592|c0_g1_i5
							TR21592|c0_g1_i6
							TR21592|c0_g1_i8
							TR21592|c0_g1_i9
miR398b-5p	4	0.0107779	21	TR18231|c0_g1	---NA---	1	TR18231|c0_g1_i1
miR408-3p	4	0.960036	594	TR23356|c0_g1	type II cytoskeletal 2 epidermal-like	1	TR23356|c0_g1_i1
miR408-3p.1	4	0.941445	2657	TR10359|c1_g1	glutaredoxin domain-containing cysteine-rich CG12206	6	TR10359|c1_g1_i1
							TR10359|c1_g1_i2
							TR10359|c1_g1_i3
							TR10359|c1_g1_i4
							TR10359|c1_g1_i5
							TR10359|c1_g1_i6
miR408-3p.1	4	0.89713	2870	TR26502|c2_g1	Ribonuclease 1	8	TR26502|c2_g1_i1
							TR26502|c2_g1_i10
							TR26502|c2_g1_i11
							TR26502|c2_g1_i2
							TR26502|c2_g1_i5
							TR26502|c2_g1_i6
							TR26502|c2_g1_i8
							TR26502|c2_g1_i9
miR444a-3p	4	0.654225	420	TR19341|c1_g1	adenosylhomocysteinase isoform X1	1	TR19341|c1_g1_i1
miR444b	4	0.0267273	2030	TR27379|c1_g1	chloroplastic-like isoform X1	3	TR27379|c1_g1_i3
							TR27379|c1_g1_i7
							TR27379|c1_g1_i8
miR444c	4	0.893875	358	TR2177|c1_g2	---NA---	1	TR2177|c1_g2_i1
miR444d	4	0.137263	1732	TR19738|c0_g1	metallothionein type 2	5	TR19738|c0_g1_i1
							TR19738|c0_g1_i2
							TR19738|c0_g1_i4
							TR19738|c0_g1_i5
							TR19738|c0_g1_i6
miR444d	4	0.892573	3277	TR28656|c1_g1	ERAD-associated E3 ubiquitin- ligase HRD1-like isoform X1	6	TR28656|c1_g1_i1
							TR28656|c1_g1_i2
							TR28656|c1_g1_i4
							TR28656|c1_g1_i6
							TR28656|c1_g1_i7
							TR28656|c1_g1_i9
miR444d	4	0.862911	1512	TR7334|c0_g1	---NA---	9	TR7334|c0_g1_i1
							TR7334|c0_g1_i10
							TR7334|c0_g1_i11
							TR7334|c0_g1_i3
							TR7334|c0_g1_i4
							TR7334|c0_g1_i5
							TR7334|c0_g1_i6
							TR7334|c0_g1_i8
							TR7334|c0_g1_i9
miR5082	4	0.364774	4324	TR24300|c7_g1	senescence-associated partial	9	TR24300|c7_g1_i11
							TR24300|c7_g1_i2
							TR24300|c7_g1_i3
							TR24300|c7_g1_i4
							TR24300|c7_g1_i5
							TR24300|c7_g1_i6
							TR24300|c7_g1_i7
							TR24300|c7_g1_i8
							TR24300|c7_g1_i9
miR5083	4	0.231091	1309	TR22769|c7_g2	histone H1	3	TR22769|c7_g2_i2
							TR22769|c7_g2_i5
							TR22769|c7_g2_i7
miR528-3p	3	0.265811	165	TR1686|c1_g3	---NA---	1	TR1686|c1_g3_i1
miR528-3p	0	0.313093	1937	TR8922|c0_g1	Peptidyl-prolyl cis-trans isomerase-like 3	4	TR8922|c0_g1_i1
							TR8922|c0_g1_i2
							TR8922|c0_g1_i3
							TR8922|c0_g1_i4
miR528-5p	4	0.0332968	4387	TR14614|c1_g1	L-ascorbate oxidase	4	TR14614|c1_g1_i1
							TR14614|c1_g1_i3
							TR14614|c1_g1_i4
							TR14614|c1_g1_i5
miR529a	3	0.162688	159	TR20898|c1_g1	---NA---	1	TR20898|c1_g1_i1
miR529a	4	0.881728	892	TR25744|c1_g2	proton gradient regulation 5	6	TR25744|c1_g2_i1
							TR25744|c1_g2_i2
							TR25744|c1_g2_i3
							TR25744|c1_g2_i4
							TR25744|c1_g2_i5
							TR25744|c1_g2_i6
miR5538	4	0.0040554	144	TR1821|c1_g1	Misfit TNP1	1	TR1821|c1_g1_i1
miR6222-3p	4	0.235246	310	TR24307|c2_g3	---NA---	1	TR24307|c2_g3_i1
miR6253	3	0.0657186	423	TR13145|c0_g1	Serine carboxypeptidase II-3	4	TR13145|c0_g1_i1
							TR13145|c0_g1_i2
							TR13145|c0_g1_i3
							TR13145|c0_g1_i6
miR827-5p	4	0.789101	860	TR26622|c2_g1	CURVATURE THYLAKOID chloroplastic	7	TR26622|c2_g1_i1
							TR26622|c2_g1_i10
							TR26622|c2_g1_i11
							TR26622|c2_g1_i3
							TR26622|c2_g1_i4
							TR26622|c2_g1_i5
							TR26622|c2_g1_i9
miR9773	4	0.587088	239	TR530|c1_g1	---NA---	1	TR530|c1_g1_i1
miR9774	3	0.0224763	2278	TR9615|c0_g1	F-box SKIP22	3	TR9615|c0_g1_i1
							TR9615|c0_g1_i2
							TR9615|c0_g1_i7
