# Supplementary material for: Identification of Known and Novel Arundo donax L. MicroRNAs and Their Targets Using High-Throughput Sequencing and Degradome Analysis
Source: Life (Basel). 2022 Apr 27;12(5):651. doi: 10.3390/life12050651 (PMC9142972; doi:10.3390/life12050651)
Supplement: Supplementary file 1 [file life-12-00651-s001.zip › TableS4.xlsx]

## Sheet: miRNAs base composition
Supplementary Table S4
Base composition of A. donax miRNAs
Position	Adenine		Cytosine		Guanine		Uracil
	No.	Percentage (%)	No.	Percentage (%)	No.	Percentage (%)	No.	Percentage (%)
1	16	11.9403	11	8.20896	36	26.8657	71	52.9851
2	20	14.9254	18	13.4328	47	35.0746	49	36.5672
3	29	21.6418	28	20.8955	55	41.0448	22	16.4179
4	54	40.2985	37	27.6119	31	23.1343	12	8.95522
5	57	42.5373	22	16.4179	31	23.1343	24	17.9104
6	44	32.8358	28	20.8955	39	29.1045	23	17.1642
7	36	26.8657	17	12.6866	28	20.8955	53	39.5522
8	20	14.9254	19	14.1791	76	56.7164	19	14.1791
9	24	17.9104	33	24.6269	36	26.8657	41	30.597
10	46	34.3284	26	19.403	21	15.6716	41	30.597
11	15	11.194	28	20.8955	41	30.597	50	37.3134
12	19	14.1791	26	19.403	60	44.7761	29	21.6418
13	25	18.6567	34	25.3731	50	37.3134	25	18.6567
14	28	20.8955	37	27.6119	44	32.8358	25	18.6567
15	34	25.3731	26	19.403	36	26.8657	38	28.3582
16	25	18.6567	27	20.1493	42	31.3433	40	29.8507
17	42	31.3433	25	18.6567	32	23.8806	35	26.1194
18	34	25.3731	38	28.3582	32	23.8806	30	22.3881
19	28	20.8955	78	58.209	21	15.6716	7	5.22388
20	25	18.6567	35	26.1194	12	8.95522	62	46.2687
21	20	16.3934	44	36.0656	28	22.9508	30	24.5902
22	14	43.75	8	25	3	9.375	7	21.875
23	3	60	1	20	0	0	1	20
24	2	50	0	0	0	0	2	50
Overall	660	23.2149	646	22.7225	801	28.1745	736	25.8881

## Sheet: miRCs base composition
Supplementary Table S4
Base composition of A. donax miRCs
Position	Adenine		Cytosine		Guanine		Uracil
	No.	Percentage (%)	No.	Percentage (%)	No.	Percentage (%)	No.	Percentage (%)
1	11	40.7407	4	14.8148	6	22.2222	6	22.2222
2	7	25.9259	3	11.1111	7	25.9259	10	37.037
3	6	22.2222	6	22.2222	8	29.6296	7	25.9259
4	9	33.3333	6	22.2222	3	11.1111	9	33.3333
5	8	29.6296	5	18.5185	10	37.037	4	14.8148
6	6	22.2222	10	37.037	6	22.2222	5	18.5185
7	4	14.8148	10	37.037	6	22.2222	7	25.9259
8	7	25.9259	9	33.3333	5	18.5185	6	22.2222
9	5	18.5185	10	37.037	7	25.9259	5	18.5185
10	7	25.9259	4	14.8148	11	40.7407	5	18.5185
11	6	22.2222	7	25.9259	6	22.2222	8	29.6296
12	3	11.1111	7	25.9259	8	29.6296	9	33.3333
13	4	14.8148	10	37.037	5	18.5185	8	29.6296
14	8	29.6296	6	22.2222	4	14.8148	9	33.3333
15	8	29.6296	7	25.9259	5	18.5185	7	25.9259
16	6	22.2222	7	25.9259	4	14.8148	10	37.037
17	7	25.9259	7	25.9259	10	37.037	3	11.1111
18	9	33.3333	6	22.2222	4	14.8148	8	29.6296
19	10	37.037	4	14.8148	3	11.1111	10	37.037
20	6	23.0769	5	19.2308	10	38.4615	5	19.2308
21	6	27.2727	6	27.2727	5	22.7273	5	22.7273
22	6	66.6667	0	0	2	22.2222	1	11.1111
23	0	0	2	50	2	50	0	0
24	0	0	0	0	1	50	1	50
Overall	149	25.8681	141	24.4792	138	23.9583	148	25.6944

## Sheet: comparison
Supplementary Table S4
Comparison of nucleotide composition of A. donax mature miRNAs identified in this work with the composition of miRNA sequences identified in silico in A. donax by Jike et al., 2018 (*) and that reported for O.sativa known mature miRNAs (Jike et al., 2018 (*))
Nucleotide	A. donax miRNAs	A. donax in silico predicted miRNAs *	O. sativa *
(sequence position)
Adenine	0.2321	0.2139	0.2296
Uracil	0.2589	0.2846	0.2635
Guanine	0.2817	0.2562	0.2579
Cytosine	0.2272	0.2454	0.249
Guanine+Cytosine	0.5089	0.5015	0.5069
Adenine+Uracil	0.491	0.4985	0.4931
Uracil (5')	0.5299	0.8511	0.6271
Adenine (10th)	0.3433	0.5035	0.3559
Uracil (11th)	0.3731	0.305	0.2712
Guanidine (11th)	0.3066	0.3333	0.4068
