# Supplementary material for: Identification of Known and Novel Arundo donax L. MicroRNAs and Their Targets Using High-Throughput Sequencing and Degradome Analysis
Source: Life (Basel). 2022 Apr 27;12(5):651. doi: 10.3390/life12050651 (PMC9142972; doi:10.3390/life12050651)
Supplement: Supplementary file 1 [file life-12-00651-s001.zip › TableS5.xlsx]

## Sheet: miRCs
miRC	miRC sequence	length	C counts	+P counts	+Na counts	+NaP counts	TMM C	TMM +P	TMM +Na	TMM +NaP
1059717-1	TTTCGGCTTATGCACTGTAGC	21	14	28	4	9	15,1793873879029	18,2070454526909	5,04169858034248	12,0468216577943
1059717-1*	GCTACAGTGCATAAGCCGGAA	21	10	9	8	2	10,8424195627878	5,85226460979351	10,083397160685	2,67707147950985
106684-5	GTGTGCTTAGTCGCTTGACTT	21	8	7	8	5	8,67393565023026	4,55176136317273	10,083397160685	6,69267869877461
106684-5*	AAGTCAAGCGACTAAGCACAC	21	4	7	6	6	4,33696782511513	4,55176136317273	7,56254787051372	8,03121443852954
147425-4	ATTTACCACTGTCAGTGACACAG	23	7	17	13	14	7,58969369395147	11,0542775962766	16,3855203861131	18,7395003565689
147425-4*	TGTCACTGACAGTAGTAAAT	20	0	1	0	2	0	0,65025162331039	0	2,67707147950985
1674179-1	TGGATCCGGAGCTGTGCCAAA	21	25	55	24	23	27,1060489069696	35,7638392820715	30,2501914820549	30,7863220143632
1674179-1*	TTTGGCACAGCTCCGGATCC	20	23	41	22	21	24,937564994412	26,660316555726	27,7293421918836	28,1092505348534
174433-3	AAAGACTTTGTTGTTGTTGTTGTT	24	10	19	19	23	10,8424195627878	12,3547808428974	23,9480682566268	30,7863220143632
174433-3*	AACAACAACAACAACAAAGCCTTT	24	14	40	18	16	15,1793873879029	26,0100649324156	22,6876436115412	21,4165718360788
185842-3	GTCCCTCTGACGTGAGCCACT	21	121	237	129	93	131,193276709733	154,109634724562	162,594779216045	124,483823797208
185842-3*	GTGGCTCACGTCAGAGGGAC	20	33	83	31	58	35,7799845571998	53,9708847347624	39,0731639976542	77,6350729057855
19508-19	ATCAGGACAGAGAATCACTTC	21	109	187	80	67	118,182373234387	121,597053559043	100,83397160685	89,6818945635798
19508-19*	GAAGTGATTCTCTGTCCTGAT	21	23	39	14	17	24,937564994412	25,3598133091052	17,6459450311987	22,7551075758337
20665-18	TGTCCATTGGCAACCCAGGGGA	22	9	37	34	26	9,75817760650904	24,0593100624844	42,8544379329111	34,801929233628
20665-18*	TCCCCTGGGTTGCCAATGGACA	22	11	6	2	2	11,9266615190666	3,90150973986234	2,52084929017124	2,67707147950985
2107992-1	TAGGTGGACATCCTCTTAGGA	21	11	3	2	12	11,9266615190666	1,95075486993117	2,52084929017124	16,0624288770591
2107992-1*	TCCTAAGAGGATGTCCATCTA	21	1	2	8	1	1,08424195627878	1,30050324662078	10,083397160685	1,33853573975492
2135661-1	AGTGAAGCTGTACCAAACGCT	21	16	13	14	6	17,3478713004605	8,45327110303507	17,6459450311987	8,03121443852954
2135661-1*	GCGTTTGGTACAGCTTCACT	20	12	23	12	11	13,0109034753454	14,955787336139	15,1250957410274	14,7238931373042
2495602-1	TCCAGTGAAGCTGTACCAAACGC	23	10	14	12	8	10,8424195627878	9,10352272634546	15,1250957410274	10,7082859180394
2495602-1*	AGCGTTTGGTACAGCTTCATTAGA	24	1	14	3	0	1,08424195627878	9,10352272634546	3,78127393525686	0
2508-96	AGGACCTGGGTCTAACCATTGT	22	108	237	84	111	117,098131278108	154,109634724562	105,875670187192	148,577467112796
2508-96*	ACAATGGTTAGACCCAGGTCCT	22	107	173	68	70	116,01388932183	112,493530832698	85,7088758658222	93,6975017828446
256921-3	GACAGCTTCACTGAATTCTGG	21	14	4	5	3	15,1793873879029	2,60100649324156	6,3021232254281	4,01560721926477
256921-3*	CAGAATTCAGTGAAGCTGTA	20	5	10	1	4	5,42120978139391	6,5025162331039	1,26042464508562	5,35414295901969
2686976-1	CAGAAGCACGTTGCCACGTG	20	47	115	55	49	50,9593719451028	74,7789366806949	69,3233554797091	65,5882512479912
2686976-1*	CACGTGGCAACGTGCTTCTGAC	22	15	51	20	25	16,2636293441817	33,1628327888299	25,2084929017124	33,4633934938731
310360-3	CCCTCGCCGGAGCTCGCGTGCA	22	36	17	7	14	39,0327104260362	11,0542775962766	8,82297251559934	18,7395003565689
310360-3*	GCTGCGCGCGGCTCTGTCGAGTG	23	1	2	1	1	1,08424195627878	1,30050324662078	1,26042464508562	1,33853573975492
32911-12	GAATACGACACTGTTCCTCGT	21	0	17	12	5	0	11,0542775962766	15,1250957410274	6,69267869877461
32911-12*	ACGAGGAACAGTGTCGTATTC	21	5	5	4	1	5,42120978139391	3,25125811655195	5,04169858034248	1,33853573975492
34553-12	CTGTACCAAACGCTGAAAACAG	22	20	41	14	24	21,6848391255756	26,660316555726	17,6459450311987	32,1248577541181
34553-12*	CTGTTTTCAGCGTTTGGTACAG	22	12	19	8	18	13,0109034753454	12,3547808428974	10,083397160685	24,0936433155886
35861-11	AGGCACCTCCAAAGCCGTT	19	1	0	8	6	1,08424195627878	0	10,083397160685	8,03121443852954
35861-11*	GTTGGGTCACTGACACGTAGG	21	0	2	0	0	0	1,30050324662078	0	0
366946-2	GTTGGGTCACTGACACGTAGG	21	18	30	17	25	19,5163552130181	19,5075486993117	21,4272189664555	33,4633934938731
366946-2*	CCCACGTGTCAGTGACCCAAC	21	9	23	6	5	9,75817760650904	14,955787336139	7,56254787051372	6,69267869877461
37052-11	CTTTGTCCTGGCTTCTGTTGCA	22	10	36	21	31	10,8424195627878	23,409058439174	26,468917546798	41,4946079324026
37052-11*	TGCAACAGAAGCCAGGACAAA	21	7	11	15	7	7,58969369395147	7,15276785641429	18,9063696762843	9,36975017828446
443013-2	AAGCCAACCGTTCAAAGTTA	20	21	30	15	24	22,7690810818544	19,5075486993117	18,9063696762843	32,1248577541181
443013-2*	TAATTTTGAACGGTTGGCTT	20	15	20	8	9	16,2636293441817	13,0050324662078	10,083397160685	12,0468216577943
49734-8	ATATGCCACTGTCAGTGACTGAGG	24	27	19	12	16	29,2745328195271	12,3547808428974	15,1250957410274	21,4165718360788
49734-8*	CCTCAATCACTGACAGTGGCATA	23	3	6	5	2	3,25272586883635	3,90150973986234	6,3021232254281	2,67707147950985
53574-8	AGAAGATCCTACTATAAAAAAACT	24	5	3	7	1	5,42120978139391	1,95075486993117	8,82297251559934	1,33853573975492
53574-8*	TTTTTTTATAGTAGGATCTTCT	22	7	5	5	3	7,58969369395147	3,25125811655195	6,3021232254281	4,01560721926477
624123-2	TCCAAAAGCTAGCTGTTCAAA	21	5	3	0	1	5,42120978139391	1,95075486993117	0	1,33853573975492
624123-2*	TTTGGACAGCTAGCTTTTGG	20	0	3	1	2	0	1,95075486993117	1,26042464508562	2,67707147950985
71512-6	GTTTTTGGGCACTTTTGGACA	21	206	261	168	156	223,353842993429	169,715673684012	211,751340374384	208,811575401768
71512-6*	TGTCCAAAAGTGCCCAGAA	19	61	127	57	49	66,1387593330057	82,5819561604196	71,8442047698804	65,5882512479912
78763-6	AAAAACGCTCGGTCAAAATC	20	4	8	4	6	4,33696782511513	5,20201298648312	5,04169858034248	8,03121443852954
78763-6*	ATTTTGACCGAGCGTTTTT	19	5	6	2	6	5,42120978139391	3,90150973986234	2,52084929017124	8,03121443852954
808846-2	AAATGAACGGCTCTGGATAT	20	6	7	2	3	6,50545173767269	4,55176136317273	2,52084929017124	4,01560721926477
808846-2*	ACCTCCAGAGCCGTTCATTT	20	2	1	0	0	2,16848391255756	0,65025162331039	0	0

## Sheet: miRCs_pre-miRNAs
miRC	miRC sequence	miRC length	miRC*	miRC sequence	miRC* length	pri-miRC id	Pre-miRC sequence	miRC start	miRCend	miRC* start	miRC* end	Pre-miRC length	%GC	MFE pre-miRC (kcal/mol)	AMFE pre-miRC	MFEI pre-miRC
2135661-1	AGTGAAGCTGTACCAAACGCT	21	2135661-1*	GCGTTTGGTACAGCTTCACT	20	TR11913|c4_g1	UGUUUGGUACAGCUUCAUUGAUUCUGCCUAAGAAUCAGCUCUGUGAAGCUGUACCAAACG	43	60	2	18	60	43.3333	-34.9	-58.1667	-1.34231
1674179-1	TGGATCCGGAGCTGTGCCAAA	21	1674179-1*	TTTGGCACAGCTCCGGATCC	20	TR13647|c1_g1	CGUUUGGCACAGCUCCUCGAGGAGCAGCUGCUGGAGCGUGAACCGGAGCUGUGCCAAACA	39	59	3	20	60	61.6667	-35.3	-58.8333	-0.954054
174433-3	AAAGACTTTGTTGTTGTTGTTGTT	24	174433-3*	AACAACAACAACAACAAAGCCTTT	24	TR14761|c3_g1	AUUGAAAGACUUUGUUGUUGUUGUUGUUGUUGUAUGUUGUAACAACAACAAUAUUGACAUUACAGGGAGUUCAAA	7	30	45	67	75	30.6667	-24.1	-32.1333	-1.04783
78763-6	AAAAACGCTCGGTCAAAATC	20	78763-6*	ATTTTGACCGAGCGTTTTT	19	TR16994|c2_g1	AUACUUUACUCCGUUUUCAUUUACUUGUCAGCAACAAUUUACUGUAGCAACUUUGACUGAGCGUCUUUUUCUAAUUUUUUUUAUUAAUUCUUAAAAACUUUGAUAUAAUUAGAUUAGUUAUGAAACAUACUUUGUUUGUAUUGUAAACUCUUAAGUGUCUGCAAAUUUAUUUCAGAAAAAAACGCUCAGUCAAAAUUGCUACAGUAAGUCAAUGCUGAUAAUUAAAUGAAAACGGAGGUAAGUAA	178	199	50	68	245	27.3469	-97.3	-39.7143	-1.45224
366946-2	GTTGGGTCACTGACACGTAGG	21	366946-2*	CCCACGTGTCAGTGACCCAAC	21	TR17426|c0_g1	AUGACGCGCUGCUCUCUGACGUGGGGUCACUGACAGGUGGGUCCGGGACCGCAUAGGGCCCACAUGACAGUAACCCACAUCAGAGGGCAGCGCGUCA	21	41	59	78	97	62.8866	-68.4	-70.5155	-1.12131
366946-2	GTTGGGTCACTGACACGTAGG	21	366946-2*	CCCACGTGTCAGTGACCCAAC	21	TR17689|c2_g1	UUCCUCUGACGUAACGUCAGGUGAUGUUGGGUCACUGACAUGCGGGCCCGGAGUCUGUGGGGCCCACAUGUCAGUGACCACGUCACGUGUGUGACGUACGUCAGAGGAU	63	81	26	46	109	57.7982	-75.2	-68.9908	-1.19365
366946-2	GTTGGGTCACTGACACGTAGG	21	366946-2*	CCCACGTGTCAGTGACCCAAC	21	TR17689|c2_g2	GUGACGUUGGGUCACUGACAUGCGGGCCCGGAGUCUGUGGGGCCCACAUGUCAGUGACCAUGUCACG	6	26	43	61	67	62.6866	-49.3	-73.5821	-1.17381
185842-3	GTCCCTCTGACGTGAGCCACT	21	185842-3*	GTGGCTCACGTCAGAGGGAC	20	TR19384|c0_g1	GUUUCUCUGACGUGAGCCACUGCCAUCGGGCCCAUCCGGCAGUGGCUCACGUCAGAGGGACGA	1	22	42	58	63	63.4921	-49.8	-79.0476	-1.245
310360-3	CCCTCGCCGGAGCTCGCGTGCA	22	310360-3*	GCTGCGCGCGGCTCTGTCGAGTG	23	TR21232|c0_g1	UGCCCCUCGCCGGAGCUCGCGUGCAGCGGUGGCUGCGCGCGGCUCUGUCGAGUGGCCGCU	4	27	32	54	60	76.6667	-44.1	-73.5	-0.958696
2135661-1	AGTGAAGCTGTACCAAACGCT	21	2135661-1*	GCGTTTGGTACAGCTTCACT	20	TR22498|c1_g1	ACGUUUGGUACAGCUUCACUGAUUCUACUGAGAAUCAGCUAUGUGAAGCUGUACCAAACG	43	60	2	19	60	43.3333	-36.7	-61.1667	-1.41154
2495602-1	TCCAGTGAAGCTGTACCAAACGC	23	2495602-1*	AGCGTTTGGTACAGCTTCATTAGA	24	TR22498|c1_g1	ACGUUUGGUACAGCUUCACUGAUUCUACUGAGAAUCAGCUAUGUGAAGCUGUACCAAACG	41	60	1	22	60	43.3333	-36.7	-61.1667	-1.41154
37052-11	CTTTGTCCTGGCTTCTGTTGCA	22	37052-11*	TGCAACAGAAGCCAGGACAAA	21	TR23140|c5_g1	AUAUAUUUAGAGCUUUGUCCUGGCUUCUGUUGCAUGGCGCCAGAUGGCGUGUGCUAAAUCAAGGACGCUAUUUGGCGUCAUGCAACAGAAACUAAGACAAAGCUCUAAAUGUA	13	37	81	101	113	43.3628	-74.3	-65.7522	-1.51633
37052-11	CTTTGTCCTGGCTTCTGTTGCA	22	37052-11*	TGCAACAGAAGCCAGGACAAA	21	TR23140|c5_g1	AGCUUUGUCCUGGCUUCUGUUGCAUGACGCCAGGUAGUAAGGCUCUUCUCAUAUAUUUAGAGCUUUGUCCUGGCUUCUGUUGCAUGGCGCCAGAUGGCGUGUGCUAAAUCAAGGACGCUAUUUGGCGUCAUGCAACAGAAACUAAGACAAAGCU	3	27	130	151	154	47.4026	-81.6	-52.987	-1.11781
53574-8	AGAAGATCCTACTATAAAAAAACT	24	53574-8*	TTTTTTTATAGTAGGATCTTCT	22	TR23707|c2_g1	UAAUAGCUCAACUAAUAGAUGUUAGUGAUCUUAAAAAUUAUUAGUUUUUUUAUGGUGAAAUAGUCUACCUUAGAGGAUCCUAUUAUAAAAAAACUAAUAAUUUUUUAAUCACUAACAACUAUUUGUUGAGCUAUUAA	72	96	44	66	137	22.6277	-59	-43.0657	-1.90323
19508-19	ATCAGGACAGAGAATCACTTC	21	19508-19*	GAAGTGATTCTCTGTCCTGAT	21	TR25104|c2_g1	UGAAGUGAUUCUCUGUCAUGAUUCUAAAAGUUUAUCCUAGAGAAUAACAGAGAAUCACUUU	40	61	2	24	61	31.1475	-22.9	-37.541	-1.20526
2135661-1	AGTGAAGCTGTACCAAACGCT	21	2135661-1*	GCGTTTGGTACAGCTTCACT	20	TR25104|c2_g1	AUGUUUGGUACAGCUUUACAAAGUUAAUUUUUUGGUAGAAUCAGUGAAGCUAUACCAAACG	43	61	2	20	61	32.7869	-19.9	-32.623	-0.995
1059717-1	TTTCGGCTTATGCACTGTAGC	21	1059717-1*	GCTACAGTGCATAAGCCGGAA	21	TR25201|c0_g1	UUUUAGGAUUUUUUUUUUCAACUUAUGCACUGUAGCUACAGUCGUUACAGUGCAUAAGCCGAA	16	36	44	63	63	34.9206	-22.9	-36.3492	-1.04091
624123-2	TCCAAAAGCTAGCTGTTCAAA	21	624123-2*	TTTGGACAGCTAGCTTTTGG	20	TR2848|c4_g1	AGCUUCUGGGCAUUUUUGAACAGCUGGCUUUUAGAAUAUUCAAAAGCUAGAUGCUCUCAAAAACCAGAAGCUAAAAAA	39	61	15	34	78	35.8974	-29.9	-38.3333	-1.06786
624123-2	TCCAAAAGCTAGCTGTTCAAA	21	624123-2*	TTTGGACAGCTAGCTTTTGG	20	TR29172|c0_g3	UUUGAACGGUUGGCUUUUGGUACAUCCAAAAGCCGGAUAUCUUCAAAAGCCAAAAGCCAGAAGCACAUUGCCACGUGCUUUUCAGCUUCUGGCUUUUGAGAGCAUCUACCUUUUGAAUAUUCCAAAAACCAGCUGUCCAAAA	121	141	1	20	142	42.2535	-58.9	-41.4789	-0.981667
2107992-1	TAGGTGGACATCCTCTTAGGA	21	2107992-1*	TCCTAAGAGGATGTCCATCTA	21	TR29819|c4_g2	UGUAGGAGGAUGUCCAUCUAUGCUUUAGCAUCAUUAGAUCUGUUCUGAGAUUCGUGCAGAGCAGGAGAGAGAGGGAGAUUCUCUGCUCUGCACGAAUCUCAAAGCAGAUCCAAUAGUACAGGGCUUAGGUGGACAUCUUCGUAGGA	124	143	3	22	146	46.5753	-80.6	-55.2055	-1.18529
366946-2	GTTGGGTCACTGACACGTAGG	21	366946-2*	CCCACGTGTCAGTGACCCAAC	21	TR30763|c1_g2	UGACGUUGGGUCGCUGACACGCGGGAUCCACAGUCUCCGAGCCCGCGUGUCAGUGACCCAACGUU	5	25	42	64	65	63.0769	-49.6	-76.3077	-1.20976
2107992-1	TAGGTGGACATCCTCTTAGGA	21	2107992-1*	TCCTAAGAGGATGTCCATCTA	21	TR30873|c1_g2	UGAGGUGGUUUUUUUCCUCCUAGGAGGAUGUCCACCUAAGCCCUAUACUAUUGGAUCUGCUCUGAGAUUUGUGCAGAGUAGGAUUGAGAGAAAGAUUAUUUGAUAGAUUCUUAUUUGUACGAAUCUCAGAGCAAAUUUAAUGAUAUCAGGAUUUAGAUGGAUAUCCUCUUAGGAGGAAAAAAACCGCCUCGA	154	175	18	39	192	38.5417	-113.8	-59.2708	-1.53784
366946-2	GTTGGGTCACTGACACGTAGG	21	366946-2*	CCCACGTGTCAGTGACCCAAC	21	TR3608|c0_g1	GUCAGGUGACGUUAGGUCGCUGACACGUGGGACUCACAGAUUCCGGAUCCGCGUGUCAGUGACCUAACGUCAGCUGACA	11	31	49	68	79	56.962	-57.3	-72.5316	-1.27333
624123-2	TCCAAAAGCTAGCTGTTCAAA	21	624123-2*	TTTGGACAGCTAGCTTTTGG	20	TR3924|c0_g1	UUUUGGAUGGCUAGUUUUUAGGAUGUUUAAAAGCUAGAUGCCUCUGAAAACCCAAAGCUGAAAAGCAUAUCCCAGGUGCUUUAAUUUUUUGGUUUUCAGGAGUAUCUAGCUUUUGGACAUCUCAAAAGCUACCUGUCCAAAAAU	122	141	2	21	144	36.8056	-71.1	-49.375	-1.34151
1674179-1	TGGATCCGGAGCTGTGCCAAA	21	1674179-1*	TTTGGCACAGCTCCGGATCC	20	TR4328|c3_g1	AUUAAAAUGUUUGGCACAGUUCUAGAUCAUGAAUUUCUGGAGCUAGAGAUGACCAGCUCAAAGAAUUCUUGGAUCUGGAGCUGUGCCAAACGA	70	92	10	28	93	40.8602	-46.1	-49.5699	-1.21316
174433-3	AAAGACTTTGTTGTTGTTGTTGTT	24	174433-3*	AACAACAACAACAACAAAGCCTTT	24	TR5949|c4_g2	UUGUUUGGGACUAAAGGCUUUGUUGUUGUUGUUGUAUUUGGUUGAUCCCAAAGUGUACAUUAACCCUUGGUAUCUUAAAAACAAGGUCAAAAUGAUCAACAGCAACAAAGGCUUUUGCCCCAAGCAA	15	33	95	113	127	37.7953	-45.3	-35.6693	-0.94375
2135661-1	AGTGAAGCTGTACCAAACGCT	21	2135661-1*	GCGTTTGGTACAGCTTCACT	20	TR6670|c3_g1	AGCGUUUGGUACAGCUCCACCUGAUUCUGCUAGAGAAUCAGAAUCUGGAGCCGUACCAAACGG	43	62	2	19	63	50.7937	-36.1	-57.3016	-1.12813
53574-8	AGAAGATCCTACTATAAAAAAACT	24	53574-8*	TTTTTTTATAGTAGGATCTTCT	22	TR6821|c0_g1	AACUAAUAGUUGUUAGUGGUUUUAAAAAUCAUUAAUUUUUUUAUGGUGGGAUGAUCUACCUUAGAAGAUCUUAUUGUAAACGAAACUAAUAGUUUUUUAUGGUGGGAUGAUCUAUCUUAGAAGAUUUUACUAUAAAAAAACUAAUAGUUUUUGAGAUCACUAACAACUAUUAGUUAAAUUAUUAAUAAAUUAA	119	143	36	52	193	22.7979	-73.6	-38.1347	-1.67273
443013-2	AAGCCAACCGTTCAAAGTTA	20	443013-2*	TAATTTTGAACGGTTGGCTT	20	TR6943|c10_g1	GCUUUUGGCUUUUGGAGACAUCUGGCUUUUGGAUGUACCAAAAGCCAACCGUCCAAAGUUGGCCAGAAGCUCAAACAAACAGGGUCUCUGGGCACUUUUGAACAGCUGGCUUUUGGGAUAUCUGACAGCUGGUUUUUAGGAAAAGCACGUGGCAAUGUGCUUCUGGCUUUUGGCUUUUGGAGACAUCCGGCUUUUGGAUGUACCAAAAGCCAGCCGUUCAAAAAAGCCAGAUGCUCUCAAAAGCCAGAAGCU	42	61	94	112	252	47.2222	-124.5	-49.4048	-1.04622
443013-2	AAGCCAACCGTTCAAAGTTA	20	443013-2*	TAATTTTGAACGGTTGGCTT	20	TR6943|c10_g1	UUUUGGACAGCUGGCUUUUAGGAUAUCCAAAAGCCAGAUGCUUUCAAAAGCCAGAAGCUGAAAAGCACGUGCUUAGGCCCUGUUUGUUUGAGCUACAACGUGUUUCUGACUUUUGGCUUCUAGAGACAUUCGGUUUUUGGAUGUACUAAAAGCCAACCGUUCAAGCA	150	167	1	17	167	43.1138	-73.1	-43.7725	-1.01528
624123-2	TCCAAAAGCTAGCTGTTCAAA	21	624123-2*	TTTGGACAGCTAGCTTTTGG	20	TR6943|c10_g1	UUUUGAACAGCUGGCUUUUGGGAUAUCUGACAGCUGGUUUUUAGGAAAAGCACGUGGCAAUGUGCUUCUGGCUUUUGGCUUUUGGAGACAUCCGGCUUUUGGAUGUACCAAAAGCCAGCCGUUCAAAAA	108	127	2	21	129	44.9612	-60.3	-46.7442	-1.03966
71512-6	GTTTTTGGGCACTTTTGGACA	21	71512-6*	TGTCCAAAAGTGCCCAGAA	19	TR6943|c10_g1	AGGGUCUCUGGGCACUUUUGAACAGCUGGCUUUUGGGAUAUCUGACAGCUGGUUUUUAGGAAAAGCACGUGGCAAUGUGCUUCUGGCUUUUGGCUUUUGGAGACAUCCGGCUUUUGGAUGUACCAAAAGCCAGCCGUUCAAAAAAGCCAGAUGCUCU	4	24	136	151	157	47.7707	-73.5	-46.8153	-0.98
71512-6	GTTTTTGGGCACTTTTGGACA	21	71512-6*	TGTCCAAAAGTGCCCAGAA	19	TR6943|c10_g3	UUAGGCCCUGUUUGUUUGAGCUUUUAGUCACUUUUGGACAGCUGGCUUUUGGGAUAUCCAAAAGUCAGAUGCUCUCAAAAGCCAGAAGUUGAAAAGCACGUGGCAACGUGCUUCUGGCUUUUGGUUUUUGGAGACAUCCAACCGUUCAAAGUUGGCCAGAAGUCCAAACAAACAGGGCCUAAA	20	40	144	161	183	44.8087	-99.1	-54.153	-1.20854
											avg	113.788		-58.3394		-1.21016
											min	60		-124.5		-1.90323
											max	252		-19.9		-0.94375

## Sheet: CleaveLand_results
miRC	CleaveLand category	CleaveLand p-value	Cleaveland slice site	Target transcript	Target transcript annotation	Number of transcript isoforms	Isoforms
1674179-1	4	0.121929	350	TR27954|c4_g1	probable ribose-5-phosphate isomerase chloroplastic	14	TR27954|c4_g1_i10
							TR27954|c4_g1_i11
							TR27954|c4_g1_i13
							TR27954|c4_g1_i15
							TR27954|c4_g1_i16
							TR27954|c4_g1_i19
							TR27954|c4_g1_i2
							TR27954|c4_g1_i20
							TR27954|c4_g1_i21
							TR27954|c4_g1_i3
							TR27954|c4_g1_i4
							TR27954|c4_g1_i5
							TR27954|c4_g1_i6
							TR27954|c4_g1_i8
174433-3	3	0.552595	1543	TR10651|c1_g1	Oxygen-evolving enhancer chloroplastic	5	TR10651|c1_g1_i1
							TR10651|c1_g1_i2
							TR10651|c1_g1_i3
							TR10651|c1_g1_i5
							TR10651|c1_g1_i6
174433-3	4	0.901077	2772	TR10880|c1_g1	alpha-humulene synthase-like	4	TR10880|c1_g1_i1
							TR10880|c1_g1_i2
							TR10880|c1_g1_i3
							TR10880|c1_g1_i4
174433-3	4	0.916485	1828	TR13122|c5_g1	triose phosphate phosphate translocator	6	TR13122|c5_g1_i1
							TR13122|c5_g1_i2
							TR13122|c5_g1_i5
							TR13122|c5_g1_i6
							TR13122|c5_g1_i7
							TR13122|c5_g1_i8
174433-3	4	0.972458	504	TR13310|c3_g3	phosphoglycerate mutase AT74H	2	TR13310|c3_g3_i2
							TR13310|c3_g3_i3
174433-3	4	0.993639	705	TR13397|c3_g5	S-type anion channel SLAH2	2	TR13397|c3_g5_i1
							TR13397|c3_g5_i5
174433-3	4	0.953918	157	TR17099|c1_g2	---NA---	1	TR17099|c1_g2_i1
174433-3	4	0.895287	916	TR26211|c0_g1	inositol-pentakisphosphate 2-kinase IPK1 isoform X1	5	TR26211|c0_g1_i1
							TR26211|c0_g1_i3
							TR26211|c0_g1_i5
							TR26211|c0_g1_i8
							TR26211|c0_g1_i9
174433-3	4	0.963047	1965	TR26535|c5_g1	F-box At5g07610-like	5	TR26535|c5_g1_i1
							TR26535|c5_g1_i2
							TR26535|c5_g1_i4
							TR26535|c5_g1_i5
							TR26535|c5_g1_i6
174433-3	2	0.0625792	2135	TR27080|c1_g1	gamma-glutamyl peptidase 5-like	4	TR27080|c1_g1_i2
							TR27080|c1_g1_i3
							TR27080|c1_g1_i6
							TR27080|c1_g1_i9
174433-3	4	0.996542	214	TR3628|c0_g1	---NA---	1	TR3628|c0_g1_i1
174433-3	4	0.997764	910	TR7997|c0_g1	phosphopantothenoylcysteine decarboxylase subunit VHS3-like	5	TR7997|c0_g1_i1
							TR7997|c0_g1_i2
							TR7997|c0_g1_i3
							TR7997|c0_g1_i4
							TR7997|c0_g1_i5
174433-3	0	0.140828	918	TR8896|c0_g1	hypothetical protein SORBI_004G242300	6	TR8896|c0_g1_i1
							TR8896|c0_g1_i2
							TR8896|c0_g1_i3
							TR8896|c0_g1_i4
							TR8896|c0_g1_i5
							TR8896|c0_g1_i6
185842-3	4	0.39744	451	TR23733|c2_g1	---NA---	1	TR23733|c2_g1_i1
310360-3	4	0.0267256	939	TR3114|c1_g1	geranylgeranyl diphosphate chloroplastic	4	TR3114|c1_g1_i1
							TR3114|c1_g1_i2
							TR3114|c1_g1_i3
							TR3114|c1_g1_i5
35861-11	4	0.942844	594	TR20883|c4_g1	glycine-rich RNA-binding mitochondrial	2	TR20883|c4_g1_i5
							TR20883|c4_g1_i6
35861-11	4	0.868709	726	TR5617|c2_g1	Geranylgeranyl pyrophosphate partial	3	TR5617|c2_g1_i1
							TR5617|c2_g1_i2
							TR5617|c2_g1_i4
366946-2	2	0.0052768	502	TR28663|c1_g1	Cytochrome P450 89A2	4	TR28663|c1_g1_i1
							TR28663|c1_g1_i2
							TR28663|c1_g1_i3
							TR28663|c1_g1_i5
37052-11	4	0.960458	2022	TR13530|c1_g1	DNA-directed RNA polymerases I and III subunit RPAC2	4	TR13530|c1_g1_i1
							TR13530|c1_g1_i3
							TR13530|c1_g1_i7
							TR13530|c1_g1_i8
37052-11	4	0.856431	1394	TR17615|c1_g1	Lipase-like PAD4	1	TR17615|c1_g1_i2
37052-11	4	0.952717	591	TR23977|c1_g1	nucleic acid binding	3	TR23977|c1_g1_i1
							TR23977|c1_g1_i3
							TR23977|c1_g1_i6
71512-6	4	0.46587	4137	TR2053|c1_g1	probable GTP diphosphokinase chloroplastic	5	TR2053|c1_g1_i2
							TR2053|c1_g1_i3
							TR2053|c1_g1_i5
							TR2053|c1_g1_i6
							TR2053|c1_g1_i8
71512-6	2	0.0644667	2594	TR24307|c2_g1	B-box zinc finger 24	15	TR24307|c2_g1_i1
							TR24307|c2_g1_i10
							TR24307|c2_g1_i11
							TR24307|c2_g1_i12
							TR24307|c2_g1_i13
							TR24307|c2_g1_i15
							TR24307|c2_g1_i16
							TR24307|c2_g1_i18
							TR24307|c2_g1_i20
							TR24307|c2_g1_i3
							TR24307|c2_g1_i4
							TR24307|c2_g1_i5
							TR24307|c2_g1_i6
							TR24307|c2_g1_i7
							TR24307|c2_g1_i8
71512-6	4	0.679025	547	TR28002|c0_g2	COP9 signalosome complex subunit 4	4	TR28002|c0_g2_i2
							TR28002|c0_g2_i3
							TR28002|c0_g2_i5
							TR28002|c0_g2_i7
808846-2	3	0.0831928	561	TR19738|c1_g1	---NA---	2	TR19738|c1_g1_i1
							TR19738|c1_g1_i2
808846-2	4	0.496772	1577	TR30058|c0_g1	PNS1 isoform X1	1	TR30058|c0_g1_i3
808846-2	4	0.565254	2255	TR6738|c1_g2	Phytochrome-associated serine threonine- phosphatase	3	TR6738|c1_g2_i1
							TR6738|c1_g2_i2
							TR6738|c1_g2_i4
