# Supplementary material for: Identification of Known and Novel Arundo donax L. MicroRNAs and Their Targets Using High-Throughput Sequencing and Degradome Analysis
Source: Life (Basel). 2022 Apr 27;12(5):651. doi: 10.3390/life12050651 (PMC9142972; doi:10.3390/life12050651)
Supplement: Supplementary file 1 [file life-12-00651-s001.zip › TableS6.xlsx]

## Sheet: psRNATarget_predictions
targets predicted by psRNATarget (expectation<=1)
miRCs	Target	Description	Start	Stop	Cleavage site	Expectation
miRC19508-19	TR13335_c2_g3	translation initiation factor eIF-2B subunit epsilon	1112	1132	1123	0
miRC19508-19	TR14533_c4_g1	---NA---	961	981	972	0
miRC19508-19	TR14533_c4_g2	---NA---	1485	1505	1496	0
miRC19508-19	TR20503_c2_g2	rRNA methyltransferase	2544	2564	2555	0
miRC19508-19	TR3133_c4_g2	---NA---	16	36	27	0
miRC19508-19	TR1514_c1_g1	---NA---	148	168	159	0.5
miRC19508-19	TR1514_c1_g2	---NA---	197	217	208	0.5
miRC2135661-1	TR22498_c1_g1	---NA---	132	152	143	0
miRC2135661-1	TR5979_c2_g1	methyltransferase 16	93	113	104	0
miRC2135661-1	TR11913_c4_g1	---NA---	72	92	83	1
miRC2135661-1	TR29627_c5_g1	---NA---	53	73	64	1
